# Supplementary material for: Green One-Pot Synthesis of Coumarin-Hydroxybenzohydrazide Hybrids and Their Antioxidant Potency
Source: MDPI journal article supplement (doi:10.3390/antiox10071106), 2021-07-10
Supplement: s1 [file s1]

## Supplementary material

# Green one-pot synthesis of coumarin-hydroxybenzohydrazide hybrids and their antioxidant potency

Marko R. Antonijević<sup>1,2</sup>, Dušica M. Simijonović<sup>1</sup>, Edina H. Avdović<sup>1</sup>, Andrija Ćirić<sup>2</sup>, Zorica D. Petrović<sup>2</sup>, Jasmina Dimitrić Marković<sup>3</sup>, Višnja Stepanić<sup>4</sup>, Zoran S. Marković<sup>1\*</sup>

<sup>1</sup>University of Kragujevac, Institute for Information Technologies, Department of Science, Jovana Cvijića bb, 34000 Kragujevac, Serbia

<sup>2</sup>University of Kragujevac, Faculty of Science, Department of Chemistry, Radoja Domanovića 12, 34000 Kragujevac, Serbia

<sup>3</sup>University of Belgrade, Faculty of Physical Chemistry, Studentski trg 12-16, 11000 Belgrade, Serbia

<sup>4</sup>Ruđer Bošković Institute, Bijenička cesta 54, 10000 Zagreb, Croatia

\*Correspondence: e-mail address: [zmarkovic@uni.kg.ac.rs](mailto:zmarkovic@uni.kg.ac.rs) ; [edina.avdovic@pmf.kg.ac.rs](mailto:edina.avdovic@pmf.kg.ac.rs); phone number: +38134/610-01-95

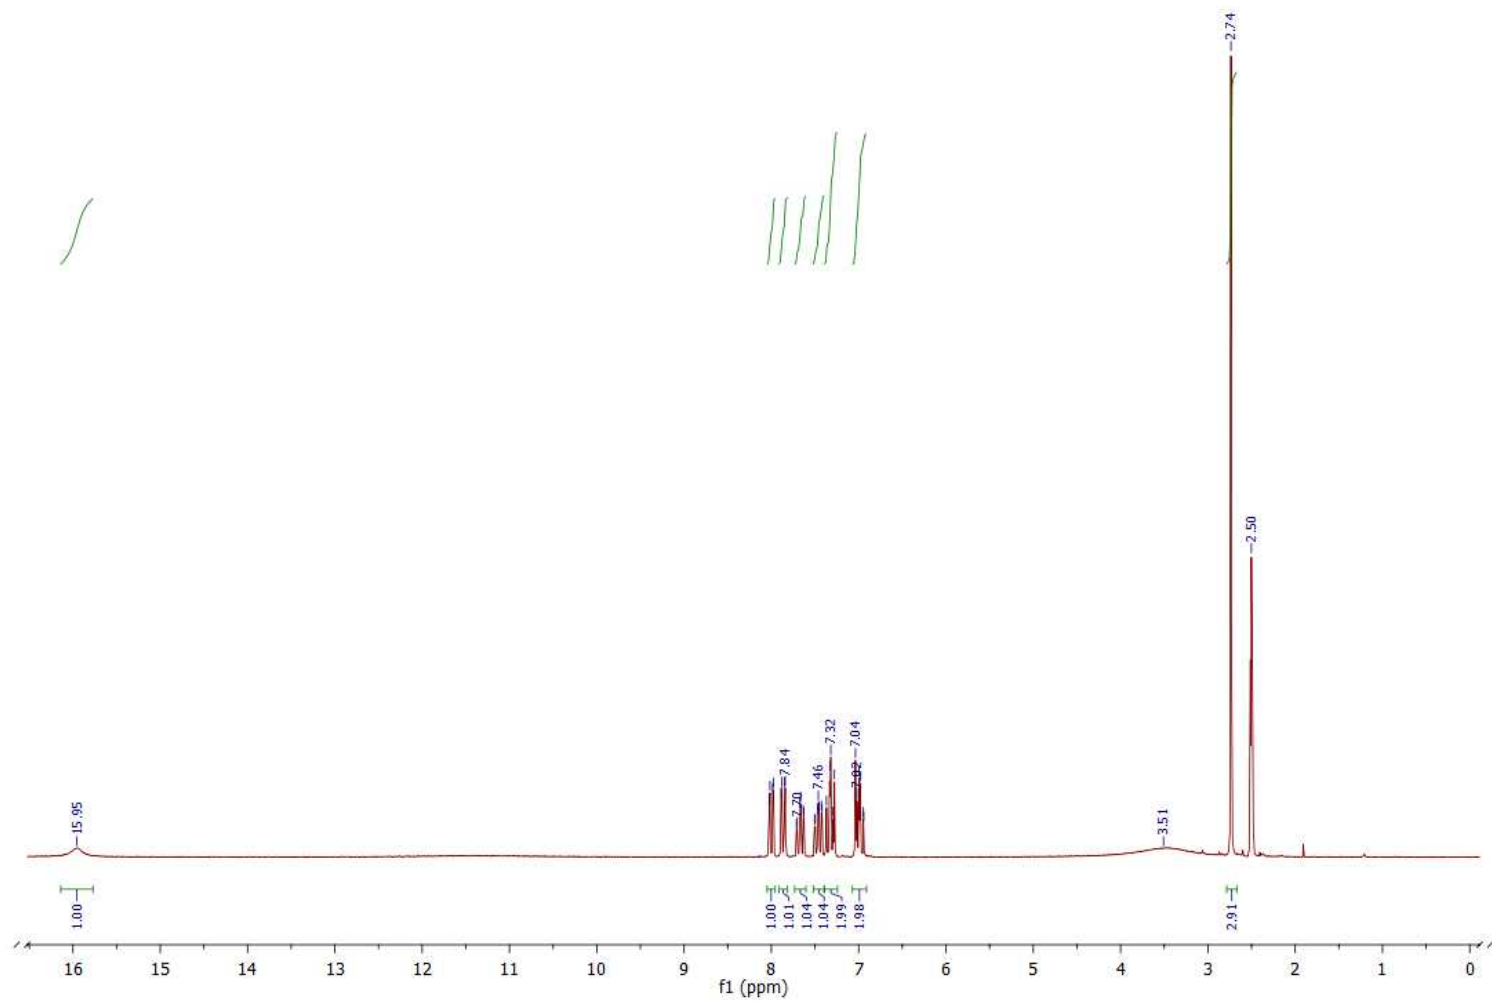

Figure S1: <sup>1</sup>H NMR spectrum of (E)-N'-(1-(2,4-dioxochroman-3-ylidene)ethyl)-2-hydroxybenzohydrazide (**3a**)

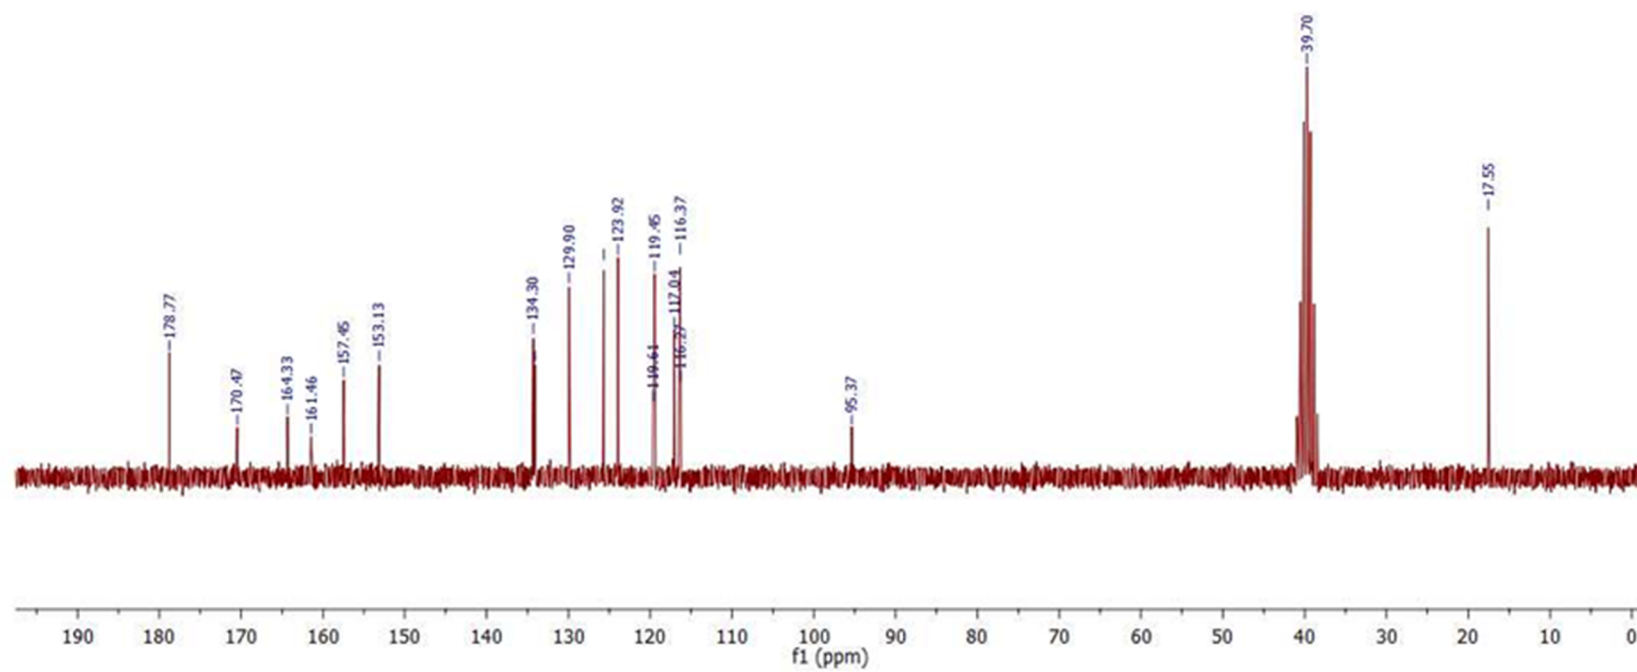

Figure S2:  $^{13}\text{C}$  NMR spectrum of *(E)*-*N'*-(1-(2,4-dioxochroman-3-ylidene)ethyl)-2-hydroxybenzohydrazide (**3a**)

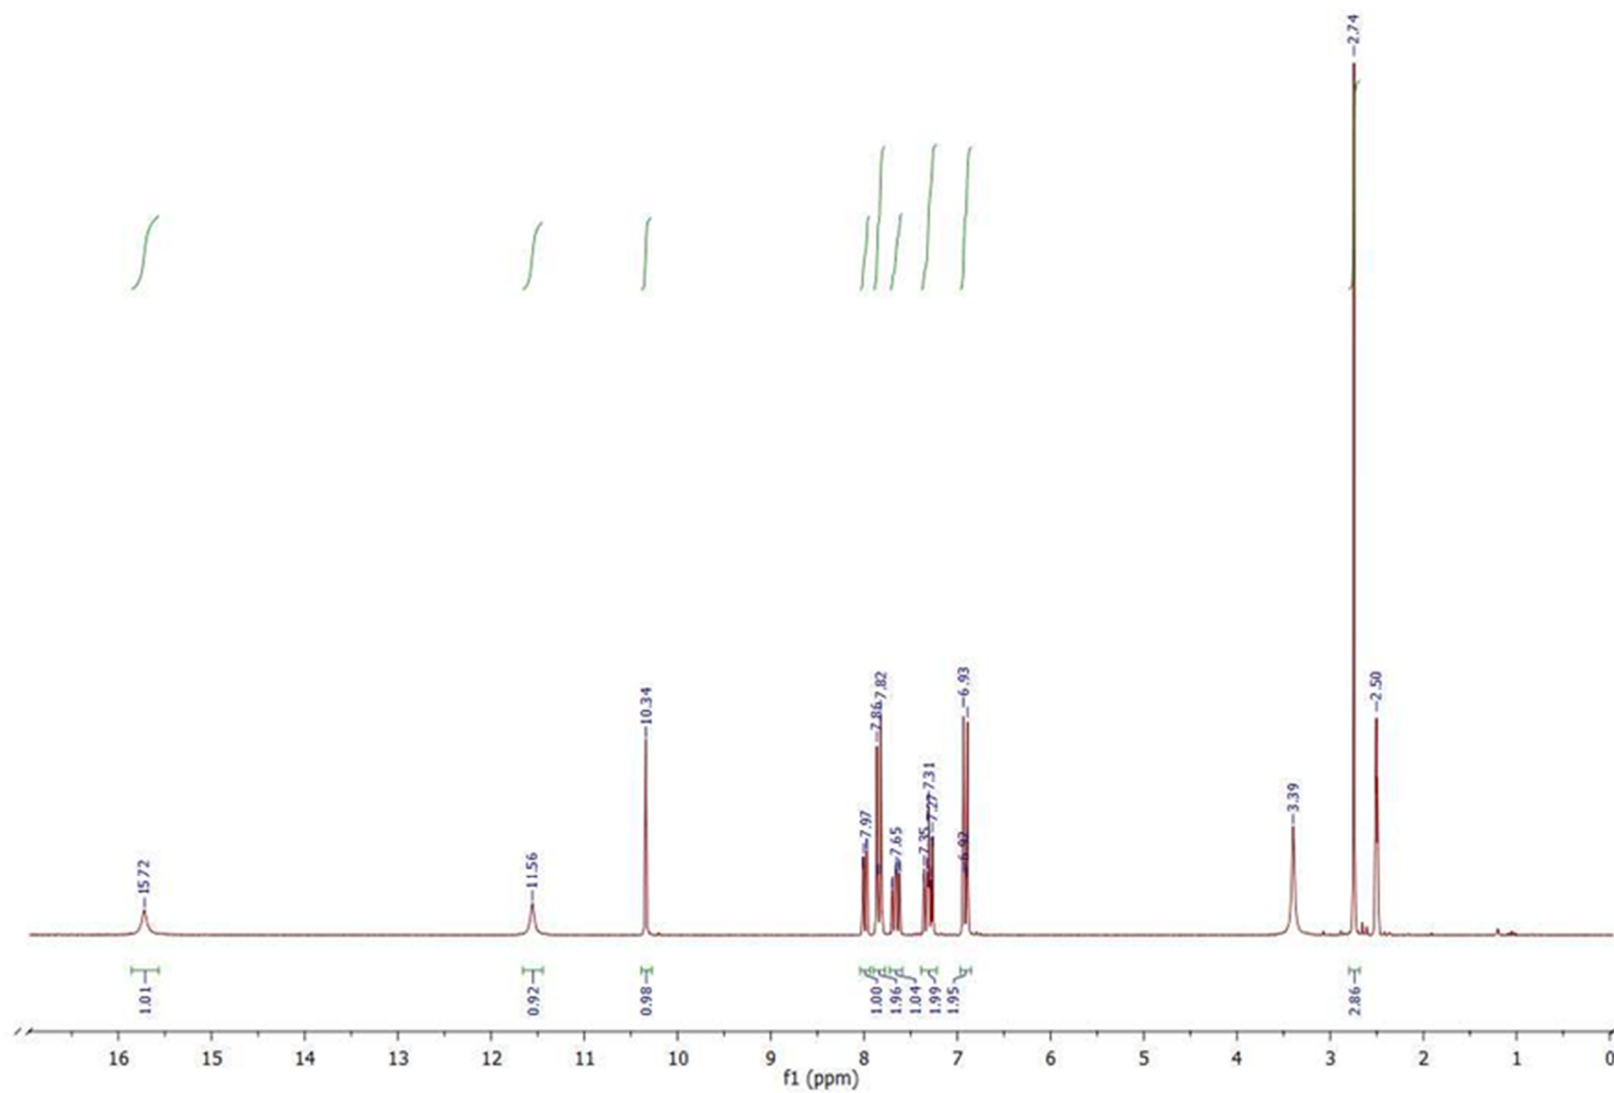

Figure S3:  $^1\text{H}$  NMR spectrum of  $(E)\text{-}N'\text{-(1-(2,4-dioxochroman-3-ylidene)ethyl)-4-hydroxybenzohydrazide}$  (**3b**)

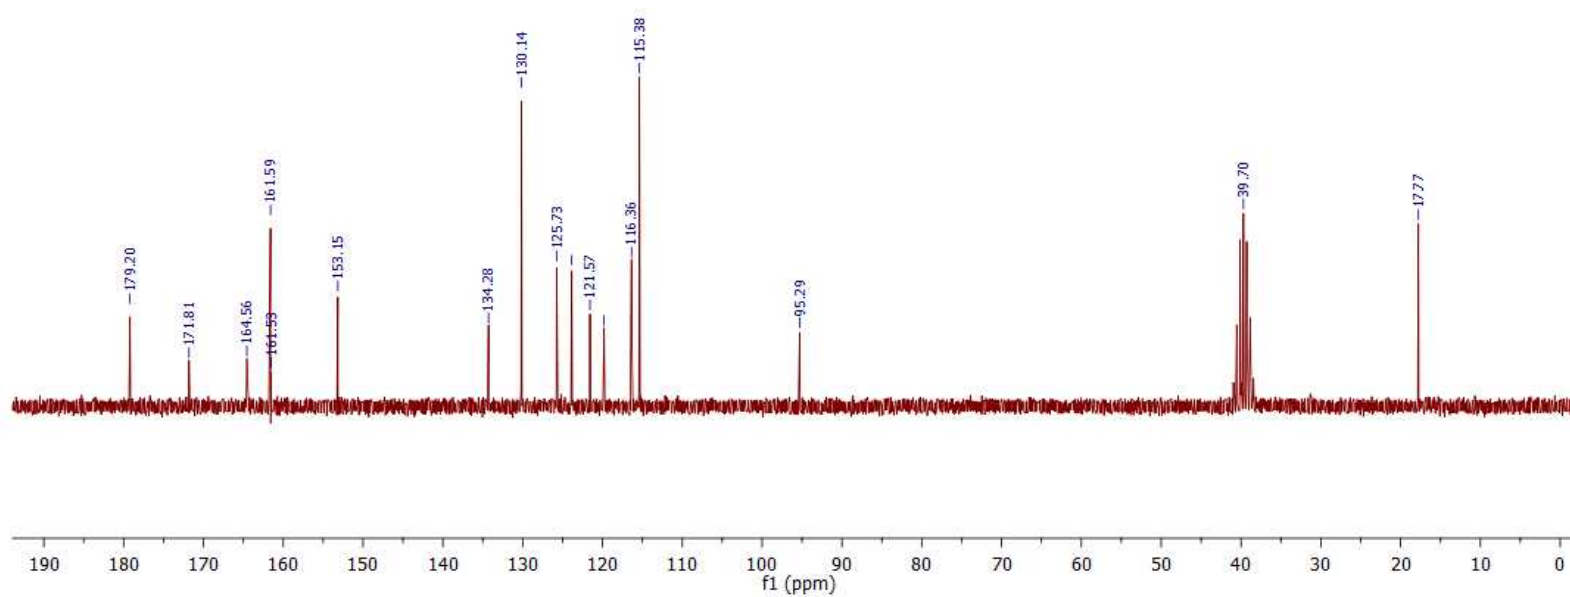

Figure S4:  $^{13}\text{C}$  NMR spectrum of *(E)*-*N'*-(1-(2,4-dioxochroman-3-ylidene)ethyl)-4-hydroxybenzohydrazide (**3b**)

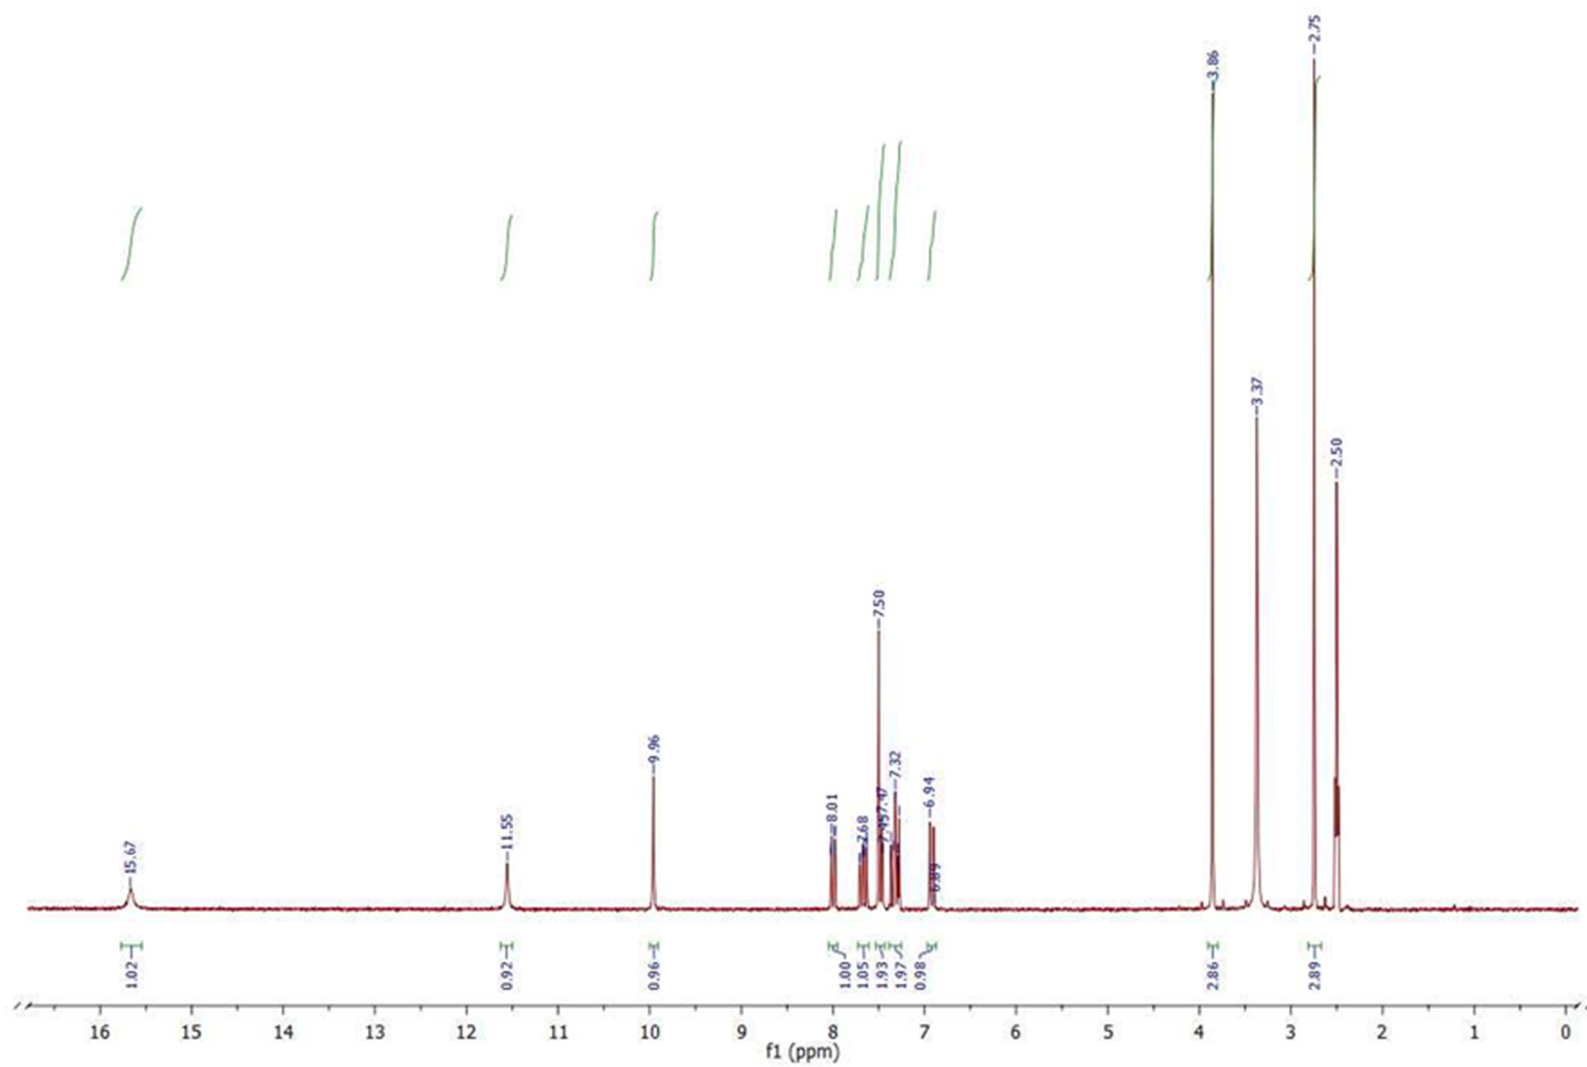

Figure S5:  $^1\text{H}$  NMR spectrum (*E*)-*N'*-(1-(2,4-dioxochroman-3-ylidene)ethyl)-4-hydroxy-3-methoxybenzohydrazide (**3c**)

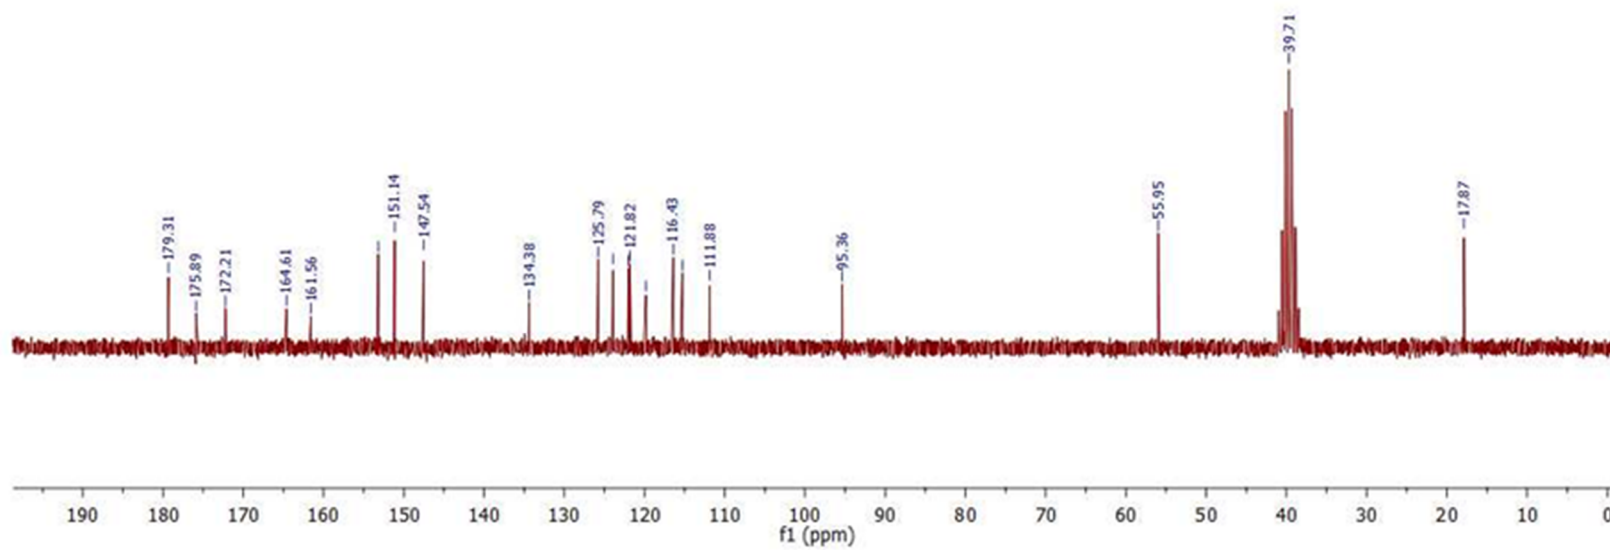

Figure S6: <sup>13</sup>C NMR spectrum of (E)-N'-(1-(2,4-dioxochroman-3-ylidene)ethyl)-4-hydroxy-3-methoxybenzohydrazide (3c)

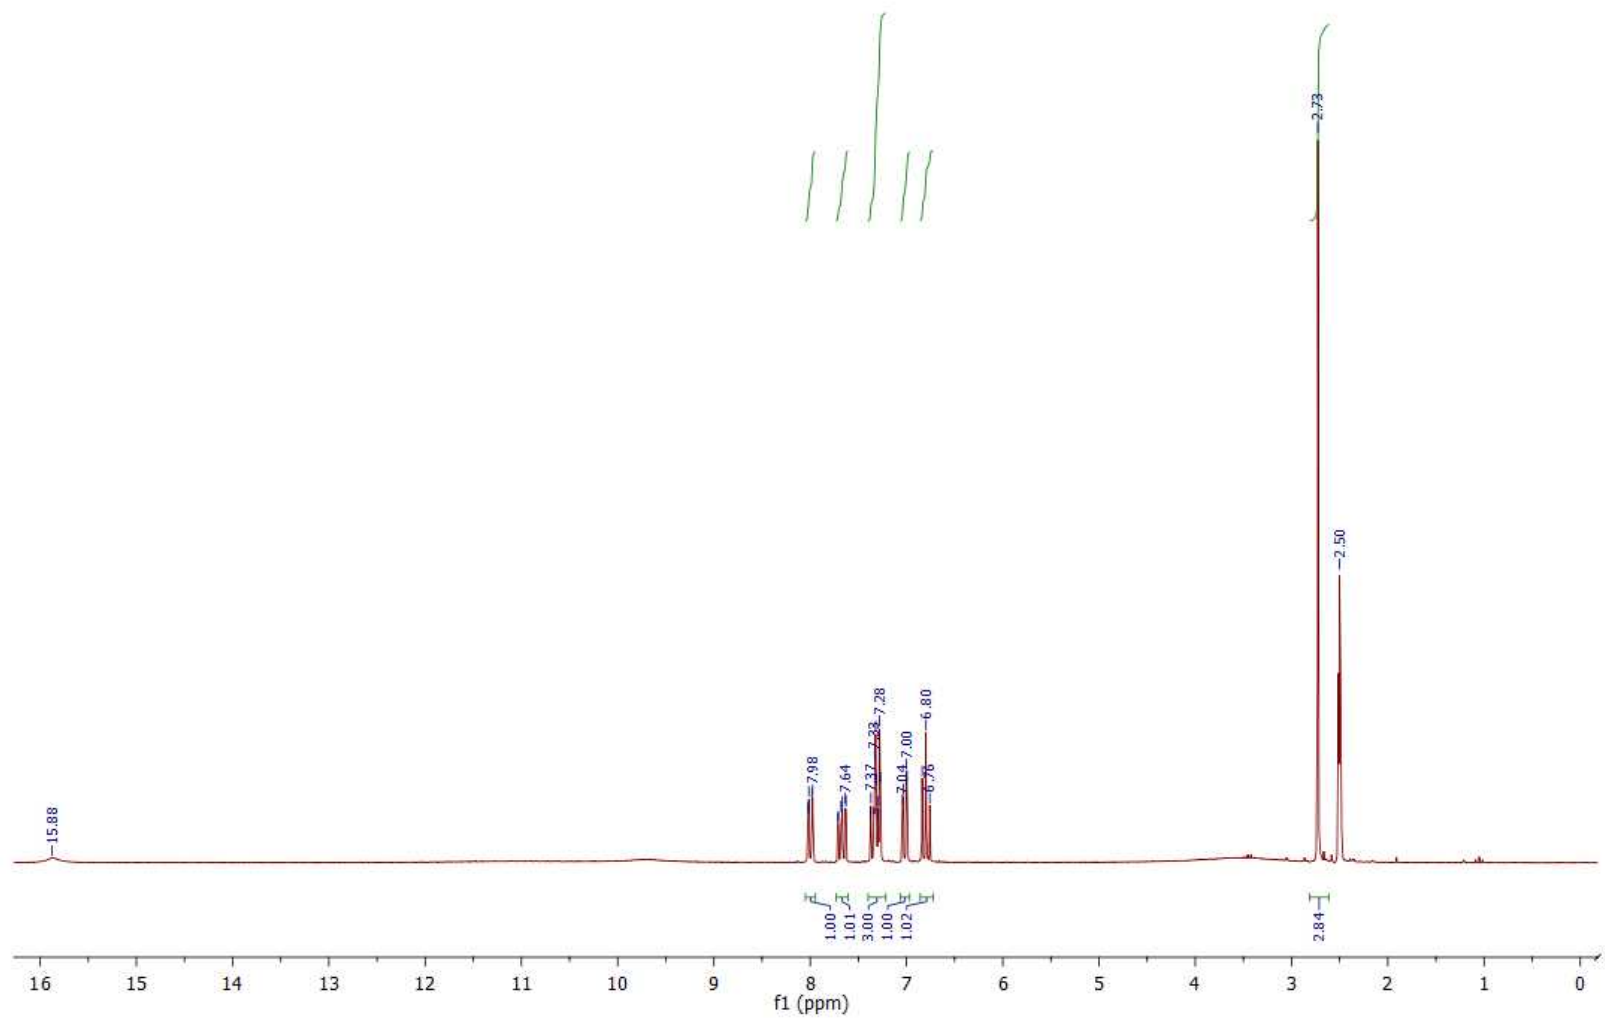

Figure S7: <sup>1</sup>H NMR spectrum (*E*)-N'-(1-(2,4-dioxochroman-3-ylidene)ethyl)-2,3-dihydroxybenzohydrazide (**3d**)



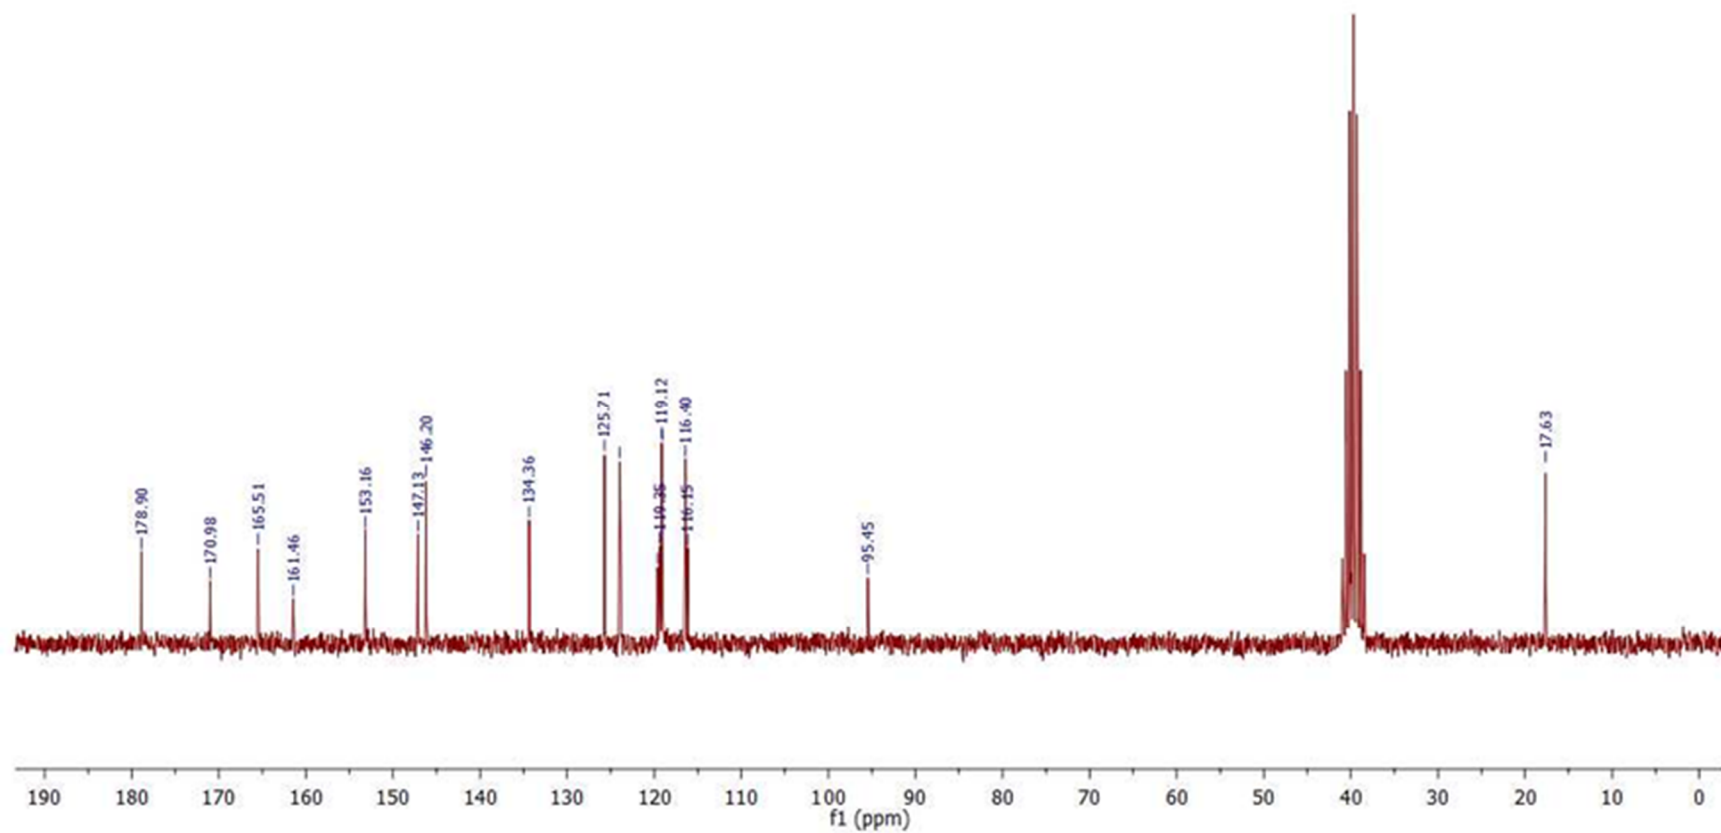

Figure S8: <sup>13</sup>C NMR spectrum of (E)-N'-(1-(2,4-dioxochroman-3-ylidene)ethyl)-2,3-dihydroxybenzohydrazide (**3d**)

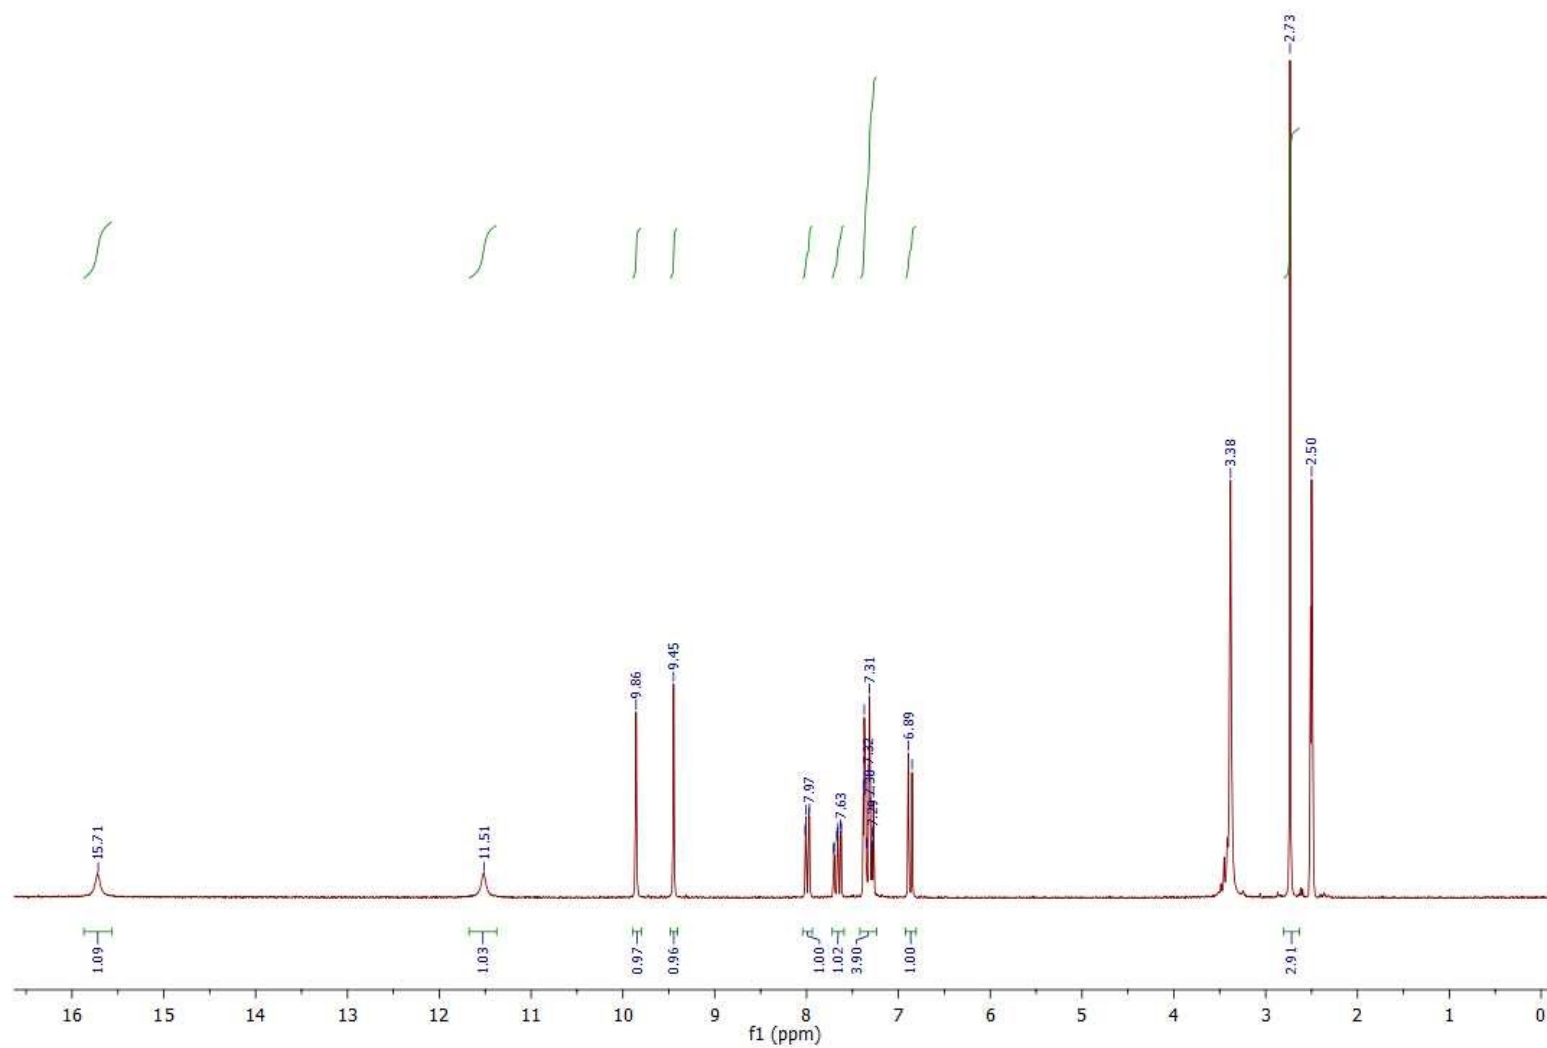

Figure S9:  $^1\text{H}$  NMR spectrum *(E)*-*N'*-(1-(2,4-dioxochroman-3-ylidene)ethyl)-3,4-dihydroxybenzohydrazide (**3e**)

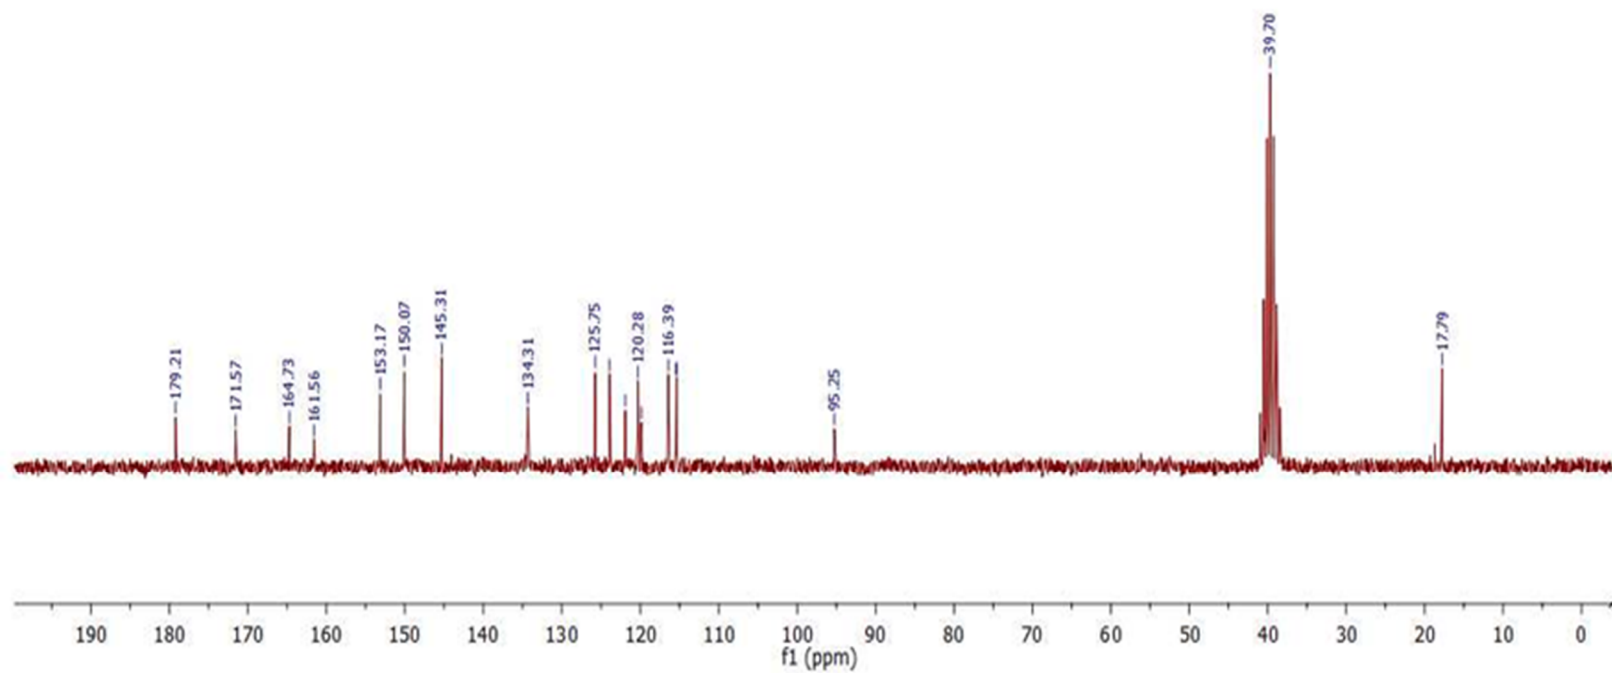

Figure S10:  $^{13}\text{C}$  NMR spectrum of *(E)*-*N'*-(1-(2,4-dioxochroman-3-ylidene)ethyl)-3,4-dihydroxybenzohydrazide (**3e**)

## HPLC analysis of investigated coumarin-hydroxybenzohydrazide 3

Table S1: HPLC data for compound 3a

|                                                        | Retention time (min) | Area     | Peak height | %       |
|--------------------------------------------------------|----------------------|----------|-------------|---------|
| 1                                                      | 2.404                | 48134    | 5402        | 0.2689  |
| 2                                                      | 2.559                | 167142   | 8624        | 0.9337  |
| 3                                                      | 16.227               | 1867     | 250         | 0.0104  |
| 4                                                      | 16.947               | 3556     | 276         | 0.0199  |
| 5                                                      | 20.509               | 2023     | 222         | 0.0113  |
| 6                                                      | 20.809               | 113605   | 8407        | 0.6347  |
| 7                                                      | 22.639               | 1001     | 93          | 0.0056  |
| 8                                                      | 23.321               | 45170    | 1544        | 0.2523  |
| 9                                                      | 24.816               | 17035    | 1727        | 0.0952  |
| 10                                                     | 25.168               | 5285     | 583         | 0.0295  |
| 11                                                     | 25.6                 | 16368320 | 1016256     | 91.4426 |
| 12                                                     | 31.701               | 1126958  | 16032       | 6.2958  |
| Wavelength: 353 nm; Duration: 45 min; Volume: 20.00 µl |                      |          |             |         |

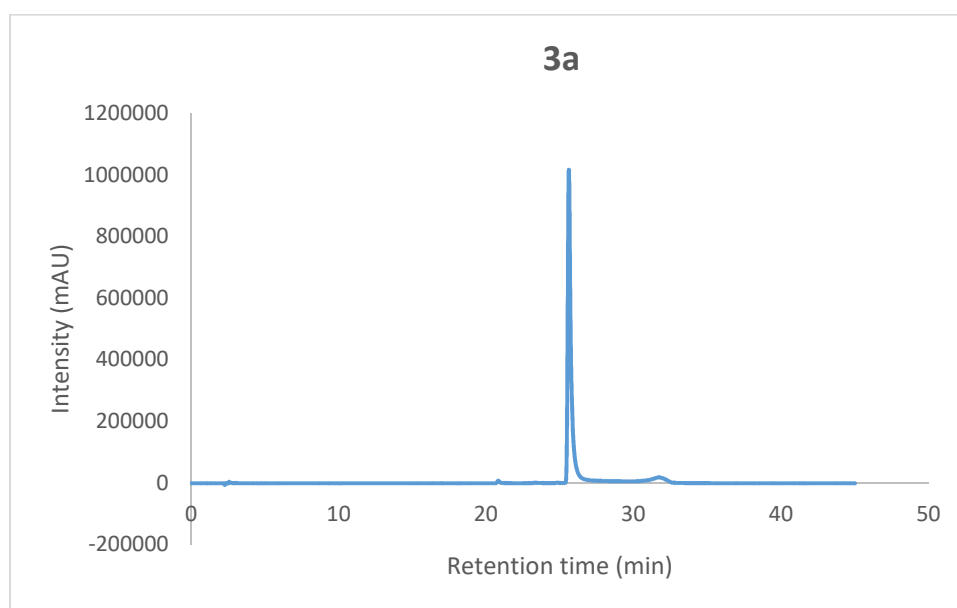

Figure S11: HPLC chromatogram of compound 3a

Table S2: HPLC data for compound **3b**

|                                                             | Retention time (min) | Area     | Peak height | %       |
|-------------------------------------------------------------|----------------------|----------|-------------|---------|
| 1                                                           | 16.232               | 4726     | 661         | 0.0363  |
| 2                                                           | 16.919               | 1975     | 249         | 0.0152  |
| 3                                                           | 17.05                | 1776     | 270         | 0.0136  |
| 4                                                           | 19.159               | 1452     | 181         | 0.0111  |
| 5                                                           | 20.839               | 15522    | 1276        | 0.1191  |
| 6                                                           | 22.255               | 12749399 | 1343934     | 97.7935 |
| 7                                                           | 23.69                | 1804     | 240         | 0.0138  |
| 8                                                           | 24.427               | 1016     | 71          | 0.0078  |
| 9                                                           | 24.884               | 163054   | 12910       | 1.2507  |
| 10                                                          | 25.693               | 90253    | 2590        | 0.6923  |
| 11                                                          | 32.35                | 5009     | 512         | 0.0384  |
| 12                                                          | 36.585               | 1073     | 112         | 0.0082  |
| Wavelength: 337 nm; Duration: 45 min; Volume: 20.00 $\mu$ l |                      |          |             |         |

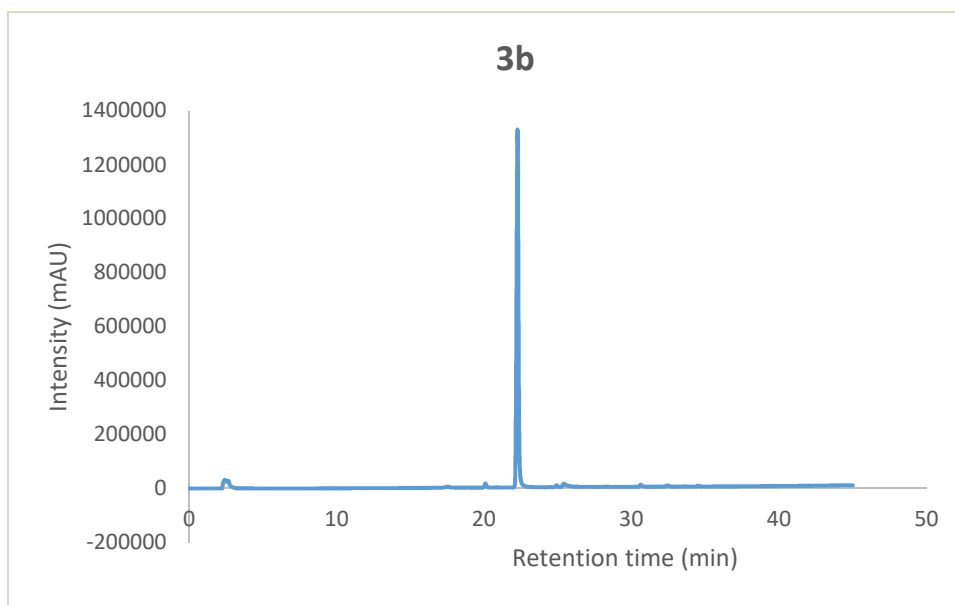

Figure S12: HPLC chromatogram of compound **3b**

Table S3: HPLC data for compound **3c**

|                                                        | Retention<br>time (min) | Area            | Peak<br>height | %              |
|--------------------------------------------------------|-------------------------|-----------------|----------------|----------------|
| 1                                                      | 16.204                  | 2244            | 324            | 0.011          |
| 2                                                      | 16.891                  | 2266            | 266            | 0.0111         |
| 3                                                      | 17.661                  | 5802            | 610            | 0.0283         |
| 4                                                      | 19.455                  | 6649            | 728            | 0.0325         |
| 5                                                      | 20.841                  | 20743           | 2173           | 0.1013         |
| 6                                                      | 21.26                   | 4303            | 492            | 0.021          |
| 7                                                      | 22.251                  | 34502           | 3415           | 0.1685         |
| 8                                                      | <b>22.734</b>           | <b>20163780</b> | <b>1957944</b> | <b>98.4982</b> |
| 9                                                      | 24.918                  | 214006          | 18546          | 1.0454         |
| 10                                                     | 25.723                  | 5322            | 365            | 0.026          |
| 11                                                     | 26.014                  | 5283            | 427            | 0.0258         |
| 12                                                     | 32.382                  | 4793            | 491            | 0.0234         |
| Wavelength: 336 nm; Duration: 45 min; Volume: 20.00 µl |                         |                 |                |                |

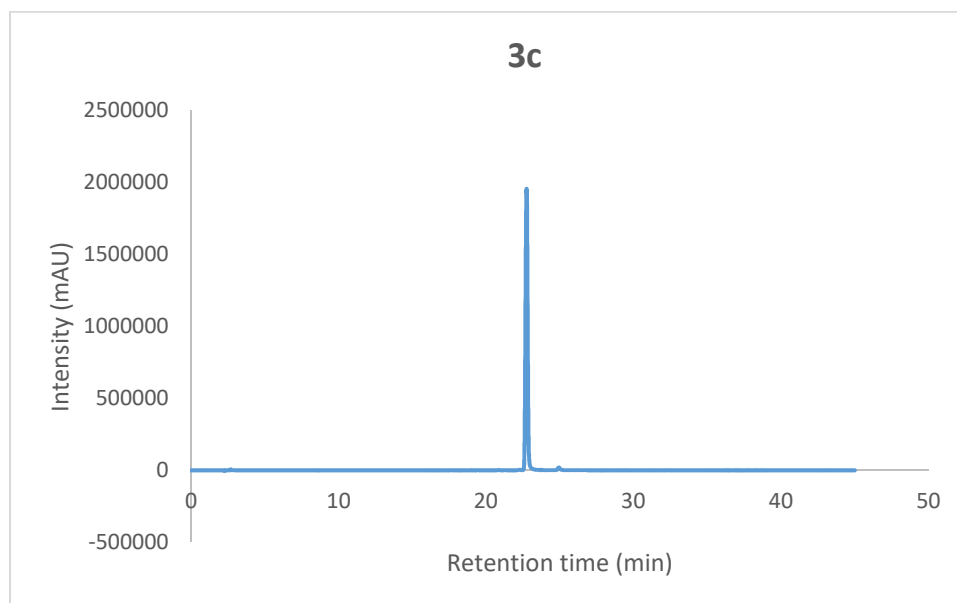

Figure S13: HPLC chromatogram of compound **3c**

Table S4: HPLC data for compound **3d**

|                                                           | Retention<br>time (min) | Area     | Peak<br>height | %       |
|-----------------------------------------------------------|-------------------------|----------|----------------|---------|
| 1                                                         | 16.288                  | 3120     | 405            | 0.0306  |
| 2                                                         | 16.968                  | 4680     | 382            | 0.0459  |
| 3                                                         | 17.885                  | 3520     | 153            | 0.0345  |
| 4                                                         | 18.677                  | 2592     | 176            | 0.0254  |
| 5                                                         | 18.801                  | 2029     | 235            | 0.0199  |
| 6                                                         | 20.157                  | 1581     | 144            | 0.0155  |
| 7                                                         | 20.739                  | 7554     | 404            | 0.0741  |
| 8                                                         | 22.219                  | 1350     | 117            | 0.0132  |
| 9                                                         | 22.507                  | 4962     | 414            | 0.0487  |
| 10                                                        | 22.683                  | 7715     | 660            | 0.0756  |
| 11                                                        | 23.403                  | 10107439 | 597973         | 99.0957 |
| 12                                                        | 24.913                  | 48187    | 3681           | 0.4724  |
| 13                                                        | 32.362                  | 4945     | 426            | 0.0485  |
| Wavelength: 345 nm; Duration: 45 min; Volume: 20.00<br>μl |                         |          |                |         |

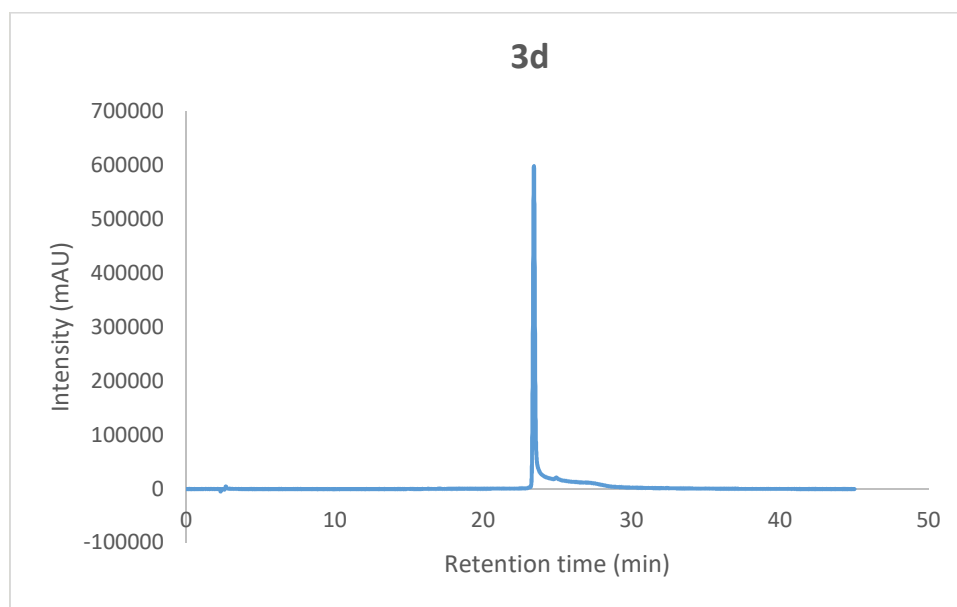

Figure S14: HPLC chromatogram of compound **3d**

Table S5: HPLC data for compound **3e**

|                                                             | Retention<br>time (min) | Area            | Peak<br>height | %            |
|-------------------------------------------------------------|-------------------------|-----------------|----------------|--------------|
| 1                                                           | 2.495                   | 65821           | 4058           | 0.3415       |
| 2                                                           | 2.705                   | 113829          | 7695           | 0.5906       |
| 3                                                           | 16.26                   | 6105            | 772            | 0.0317       |
| 4                                                           | 16.472                  | 1785            | 162            | 0.0093       |
| 5                                                           | 16.939                  | 2513            | 230            | 0.013        |
| 6                                                           | 17.085                  | 2563            | 302            | 0.0133       |
| 7                                                           | 17.964                  | 3348            | 278            | 0.0174       |
| 8                                                           | 18.32                   | 1868            | 148            | 0.0097       |
| 9                                                           | 18.635                  | 3170            | 167            | 0.0164       |
| 10                                                          | 18.97                   | 2664            | 218            | 0.0138       |
| 11                                                          | 19.535                  | 4712            | 450            | 0.0245       |
| 12                                                          | 20.082                  | 2856            | 223            | 0.0148       |
| 13                                                          | <b>20.856</b>           | <b>18783003</b> | <b>1658268</b> | <b>97.46</b> |
| 14                                                          | 22.487                  | 4212            | 332            | 0.0219       |
| 15                                                          | 23.136                  | 5274            | 349            | 0.0274       |
| 16                                                          | 23.74                   | 47480           | 1463           | 0.2464       |
| 17                                                          | 24.363                  | 1448            | 337            | 0.0075       |
| 18                                                          | 24.437                  | 1884            | 339            | 0.0098       |
| 19                                                          | 24.852                  | 199452          | 14332          | 1.0349       |
| 20                                                          | 25.429                  | 8786            | 596            | 0.0456       |
| 21                                                          | 25.771                  | 1949            | 164            | 0.0101       |
| 22                                                          | 26.234                  | 1620            | 161            | 0.0084       |
| 23                                                          | 32.338                  | 4825            | 440            | 0.025        |
| 24                                                          | 36.533                  | 1355            | 117            | 0.007        |
| Wavelength: 336 nm; Duration: 45 min; Volume: 20.00 $\mu$ l |                         |                 |                |              |

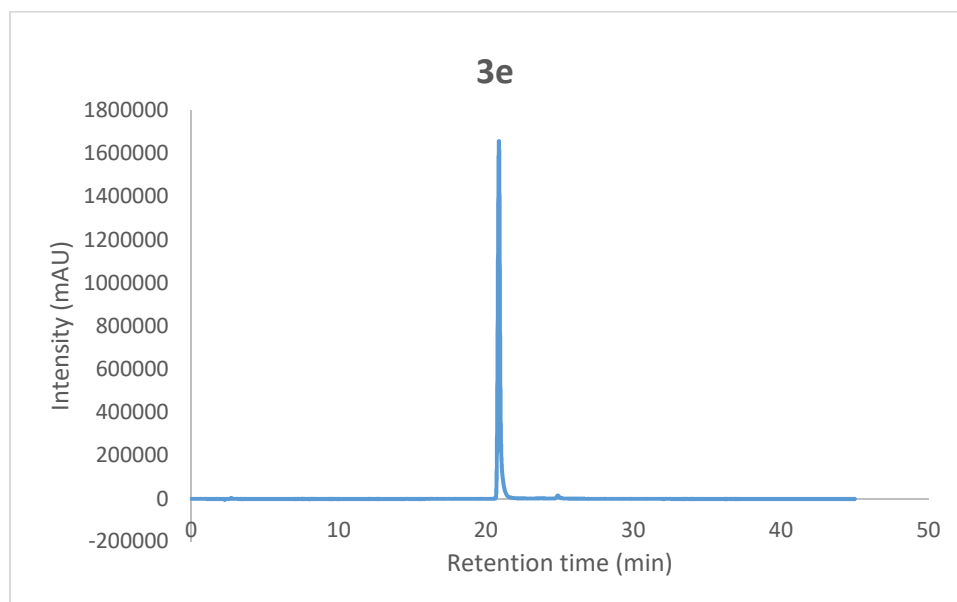

Figure S15: HPLC chromatogram of compound **3e**



## Determination of IC<sub>50</sub> value for compound 3d

Table S6: Determination of IC<sub>50</sub> value for compound 3d

| Concentration<br>( $\mu\text{mol/L}$ ) | activity (%)           |                        |                        |
|----------------------------------------|------------------------|------------------------|------------------------|
|                                        | 1 <sup>st</sup> sample | 2 <sup>nd</sup> sample | 3 <sup>rd</sup> sample |
| 2                                      | 31.97853               | 31.92145               | 31.44702               |
| 2.25                                   | 37.38497               | 35.30997               | 37.63768               |
| 2.5                                    | 42.17791               | 44.43589               | 42.08128               |
| 2.75                                   | 51.45706               | 51.21294               | 51.87998               |
| 3                                      | 52.22393               | 52.40662               | 53.09533               |
| 3.25                                   | 55.52147               | 54.37043               | 55.86783               |
| 3.5                                    | 59.77761               | 58.37505               | 58.48842               |
| 3.75                                   | 71.66411               | 70.65845               | 67.83137               |
| 4                                      | 74.84663               | 73.50789               | 76.37676               |
| 4.25                                   | 79.7546                | 80.51598               | 80.25066               |

All analyses for determination of IC<sub>50</sub> values were run in triplicate and averaged.

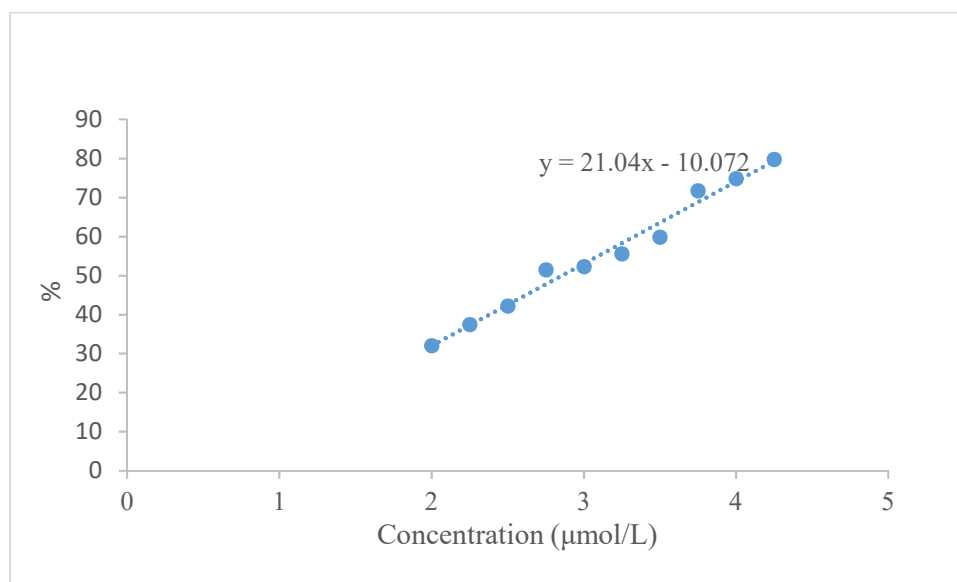

Graphic S1: Determination of IC<sub>50</sub> value for compound 3d-sample 1

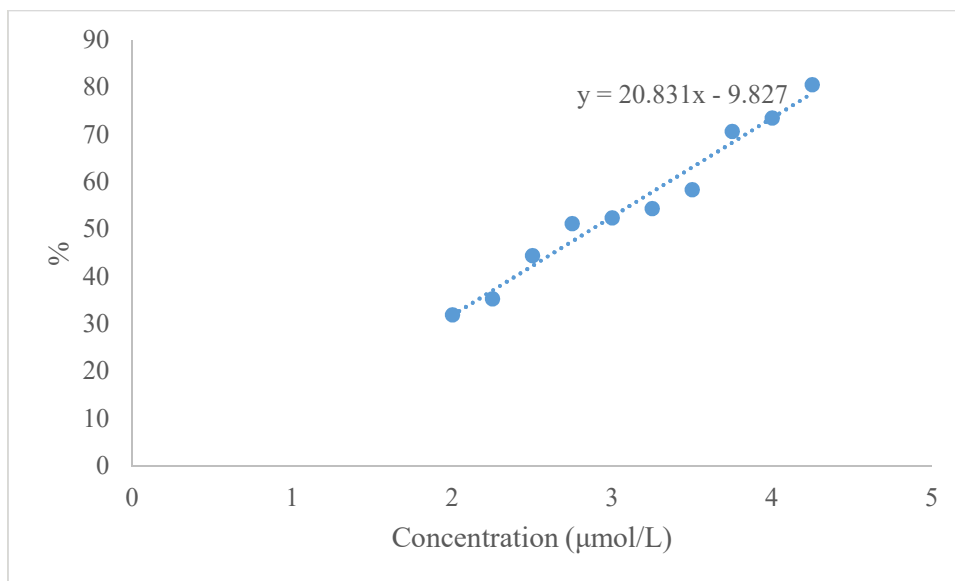

Graphic S2: Determination of IC<sub>50</sub> value for compound **3d**-sample 2

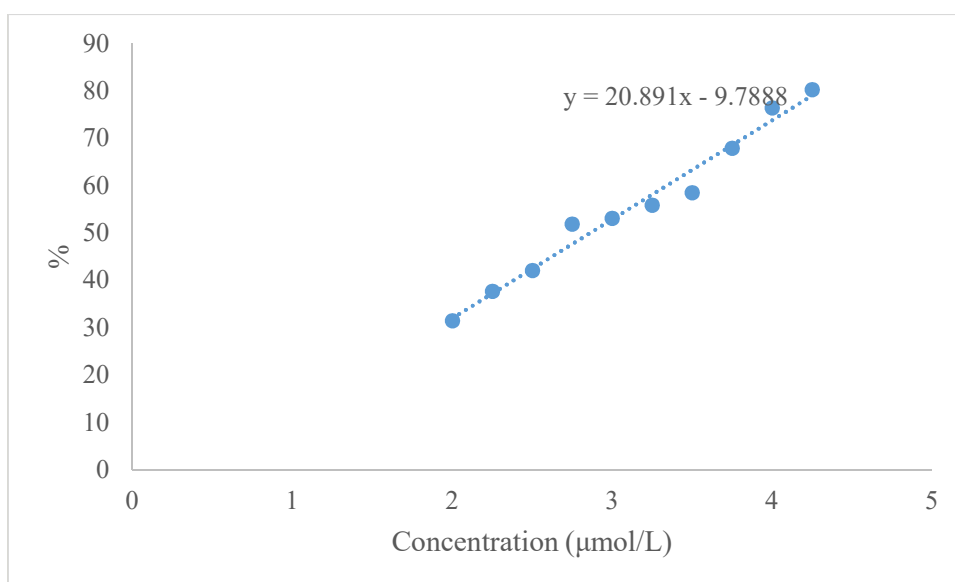

Graphic S3: Determination of IC<sub>50</sub> value for compound **3d**-sample 3

The calculation of IC<sub>50</sub> values from the equation of the line  $y=ax+b$  using the equation  $IC_{50}=(50-b)/a$

Table S7: Determination of IC<sub>50</sub> value for compound **3d**

|                  | 1 <sup>st</sup> | 2 <sup>nd</sup> | 3 <sup>rd</sup> | AVERAGE(IC <sub>50</sub> ) |
|------------------|-----------------|-----------------|-----------------|----------------------------|
| a                | 21.04           | 20.831          | 20.891          |                            |
| b                | -10.072         | -9.827          | -9.7888         |                            |
| IC <sub>50</sub> | 2.855133        | 2.872018        | 2.861941        | 2.86                       |

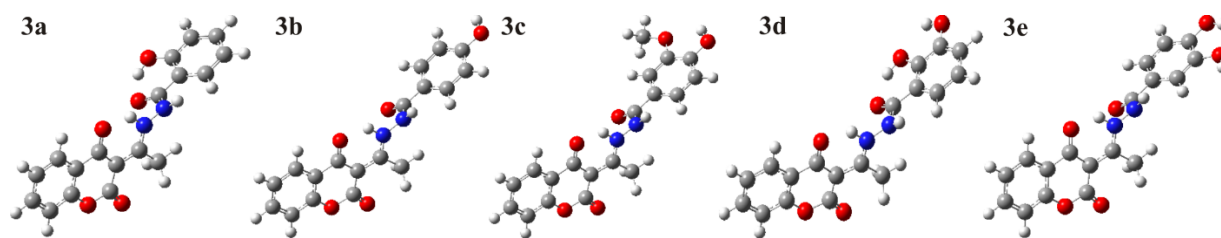

Figure S16: The most stable conformations of the investigated coumarin-hydroxybenzohydrazide derivatives

**Equations for describing the mechanisms of radical scavenging activity of investigated compounds:**

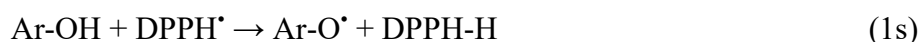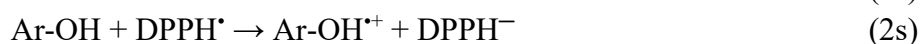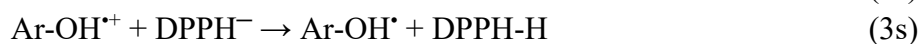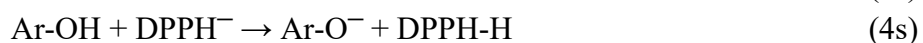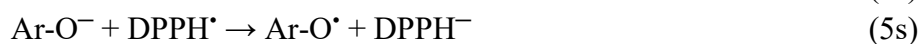

Thermodynamic parameters that describe radical scavenging activity of investigated compounds:

$$\Delta H_{\text{BDE}} = H(\text{Ar-O}^{\bullet}) + H(\text{DPPH-H}) - H(\text{Ar-OH}) - H(\text{DPPH}^{\bullet}) \quad (6s)$$

$$\Delta H_{\text{IP}} = H(\text{Ar-OH}^{\bullet+}) + H(\text{DPPH}^{-}) - H(\text{Ar-OH}) - H(\text{DPPH}^{\bullet}) \quad (7s)$$

$$\Delta H_{\text{PDE}} = H(\text{Ar-O}^{\bullet}) + H(\text{DPPH-H}) - H(\text{Ar-OH}^{\bullet+}) - H(\text{DPPH}^{-}) \quad (8s)$$

$$\Delta H_{\text{PA}} = H(\text{Ar-O}^{-}) + H(\text{DPPH-H}) - H(\text{Ar-OH}) - H(\text{DPPH}^{-}) \quad (9s)$$

$$\Delta H_{\text{ETE}} = H(\text{Ar-O}^{\bullet}) + H(\text{DPPH}^{-}) - H(\text{Ar-O}^{-}) - H(\text{DPPH}^{\bullet}) \quad (10s)$$

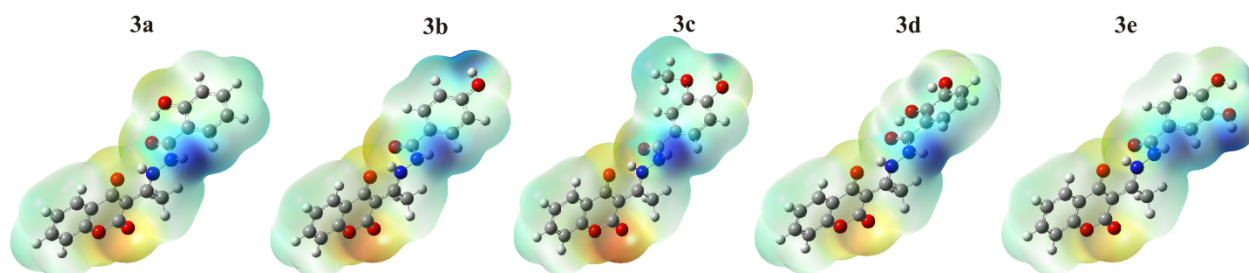

Figure S17. ESP maps of the investigated coumarin-hydroxybenzohydrazide derivatives where red colored area indicates negative charge distribution, green indicates neutral, and blue indicates positive charge

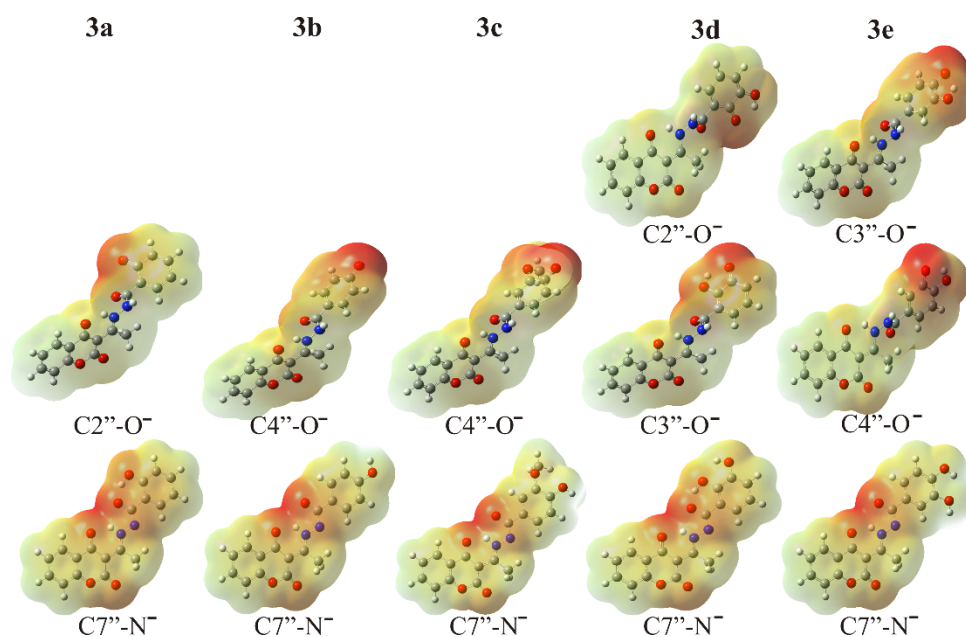

Figure S18: ESP maps of the anions of investigated compounds where red colored area indicates negative charge distribution, green/yellow indicates neutrally charged area

Table S8: Bond lengths of the investigated coumarin-hydroxybenzohydrazide derivatives

| 3a                |       | 3b                |       | 3c                |       | 3d                |       | 3e                |       |
|-------------------|-------|-------------------|-------|-------------------|-------|-------------------|-------|-------------------|-------|
| Bond distance (Å) | M062X |
| O1-C2             | 1.376 | O1-C2             | 1.376 | O1-C2             | 1.376 | O1-C2             | 1.375 | O1-C2             | 1.376 |
| C2-O2             | 1.208 |
| C2-C3             | 1.456 | C2-C3             | 1.456 | C2-C3             | 1.452 | C2-C3             | 1.457 | C2-C3             | 1.455 |
| C3-C4             | 1.450 | C3-C4             | 1.449 | C3-C4             | 1.448 | C3-C4             | 1.450 | C3-C4             | 1.448 |
| C3-C1'            | 1.419 | C3-C1'            | 1.422 | C3-C1'            | 1.422 | C3-C1'            | 1.419 | C3-C1'            | 1.422 |
| C4-O4             | 1.239 | C4-O4             | 1.240 | C4-O4             | 1.240 | C4-O4             | 1.240 | C4-O4             | 1.240 |
| C4-C10            | 1.473 | C4-C10            | 1.474 | C4-C10            | 1.474 | C4-C10            | 1.473 | C4-C10            | 1.473 |
| C10-C5            | 1.400 |
| C10-C9            | 1.389 | C10-C9            | 1.389 | C10-C9            | 1.388 | C10-C9            | 1.388 | C10-C9            | 1.389 |
| C5-C6             | 1.383 |
| C5-H5             | 1.083 |
| C6-C7             | 1.400 |
| C6-H6             | 1.083 |
| C7-C8             | 1.385 |
| C7-H7             | 1.083 |
| C8-C9             | 1.393 |
| C8-H8             | 1.083 |
| C9-O1             | 1.363 | C9-O1             | 1.363 | C9-O1             | 1.362 | C9-O1             | 1.363 | C9-O1             | 1.363 |
| C1'-C2'           | 1.494 |
| C2'-H2'(1)        | 1.091 |
| C2'-H2'(2)        | 1.088 | C2'-H2'(2)        | 1.087 | C2'-H2'(2)        | 1.087 | C2'-H2'(2)        | 1.087 | C2'-H2'(2)        | 1.087 |
| C2'-H2'(3)        | 1.086 |
| C1'-N1'           | 1.330 | C1'-N1'           | 1.327 | C1'-N1'           | 1.327 | C1'-N1'           | 1.330 | C1'-N1'           | 1.327 |

|           |       |           |       |              |       |           |       |           |       |
|-----------|-------|-----------|-------|--------------|-------|-----------|-------|-----------|-------|
| N1'-H1'   | 1.029 | N1'-H1'   | 1.028 | N1'-H1'      | 1.028 | N1'-H1'   | 1.029 | N1'-H1'   | 1.029 |
| N1'-N7''  | 1.376 | N1'-N7''  | 1.376 | N1'-N7''     | 1.376 | N1'-N7''  | 1.375 | N1'-N7''  | 1.376 |
| N7''-H7'' | 1.010 | N7''-H7'' | 1.010 | N7''-H7''    | 1.010 | N7''-H7'' | 1.010 | N7''-H7'' | 1.011 |
| N7''-C7'' | 1.371 | N7''-C7'' | 1.383 | N7''-C7''    | 1.383 | N7''-C7'' | 1.368 | N7''-C7'' | 1.383 |
| C7''-O7'' | 1.227 | C7''-O7'' | 1.214 | C7''-O7''    | 1.215 | C7''-O7'' | 1.227 | C7''-O7'' | 1.214 |
| C7''-C1'' | 1.480 | C7''-C1'' | 1.486 | C7''-C1''    | 1.487 | C7''-C1'' | 1.481 | C7''-C1'' | 1.487 |
| C1''-C2'' | 1.410 | C1''-C2'' | 1.396 | C1''-C2''    | 1.402 | C1''-C2'' | 1.400 | C1''-C2'' | 1.400 |
| C1''-C6'' | 1.404 | C1''-C6'' | 1.398 | C1''-C6''    | 1.391 | C1''-C6'' | 1.405 | C1''-C6'' | 1.392 |
| C2''-C3'' | 1.398 | C2''-C3'' | 1.385 | C2''-C3''    | 1.381 | C2''-C3'' | 1.404 | C2''-C3'' | 1.383 |
| C2''-O2'' | 1.345 | C2''-H2'' | 1.083 | C2''-H2''    | 1.082 | C2''-O2'' | 1.350 | C2''-H2'' | 1.085 |
| O2''-H2'' | 0.977 | C3''-H3'' | 1.085 | C3''-O3''    | 1.357 | O2''-H2'' | 0.978 | C3''-O3'' | 1.362 |
| C3''-H3'' | 1.083 | C3''-C4'' | 1.396 | O3''-C8''    | 1.423 | C3''-O3'' | 1.356 | O3''-H3'' | 0.963 |
| C3''-C4'' | 1.383 | C4''-C5'' | 1.395 | C8''-H8''(1) | 1.092 | O3''-H3'' | 0.966 | C3''-C4'' | 1.403 |
| C4''-H4'' | 1.084 | C4''-O4'' | 1.354 | C8''-H8''(2) | 1.086 | C3''-C4'' | 1.382 | C4''-O4'' | 1.352 |
| C4''-C5'' | 1.398 | O4''-H4'' | 0.963 | C8''-H8''(3) | 1.092 | C4''-H4'' | 1.083 | O4''-H4'' | 0.966 |
| C5''-C6'' | 1.382 | C5''-C6'' | 1.385 | C3''-C4''    | 1.409 | C4''-C5'' | 1.397 | C4''-C5'' | 1.388 |
| C5''-H5'' | 1.082 | C5''-H5'' | 1.083 | C4''-C5''    | 1.384 | C5''-H5'' | 1.082 | C5''-C6'' | 1.398 |
| C6''-H6'' | 1.084 | C6''-H6'' | 1.084 | C4''-O4''    | 1.350 | C5''-C6'' | 1.382 | C5''-H5'' | 1.083 |
|           |       |           |       | O4''-H4''    | 0.967 | C6''-H6'' | 1.083 | C6''-H6'' | 1.082 |
|           |       |           |       | C5''-C6''    | 1.392 |           |       |           |       |
|           |       |           |       | C5''-H5''    | 1.083 |           |       |           |       |
|           |       |           |       | C6''-H6''    | 1.083 |           |       |           |       |

Table S9: Bond angles of the investigated coumarin-hydroxybenzohydrazide derivatives

| 3a             |        | 3b             |        | 3c             |        | 3d             |        | 3e             |        |
|----------------|--------|----------------|--------|----------------|--------|----------------|--------|----------------|--------|
| Bond angle (°) | M062X  |
| O1-C2-O2       | 114.84 | O1-C2-O2       | 114.78 | O1-C2-O2       | 114.79 | O1-C2-O2       | 114.86 | O1-C2-O2       | 114.79 |
| O1-C2-C3       | 118.06 | O1-C2-C3       | 118.06 | O1-C2-C3       | 118.04 | O1-C2-C3       | 118.04 | O1-C2-C3       | 118.06 |
| O1-C9-C10      | 121.82 | O1-C9-C10      | 121.79 | O1-C9-C10      | 118.04 | O1-C9-C10      | 121.85 | O1-C9-C10      | 121.80 |
| O1-C9-C8       | 116.88 | O1-C9-C8       | 116.90 | O1-C9-C8       | 116.86 | O1-C9-C8       | 116.83 | O1-C9-C8       | 116.89 |
| O2-C2-C3       | 127.10 | O2-C2-C3       | 127.15 | O2-C2-C3       | 127.16 | O2-C2-C3       | 127.09 | O2-C2-C3       | 127.15 |
| C2-C3-C4       | 120.38 | C2-C3-C4       | 120.40 | C2-C3-C4       | 120.41 | C2-C3-C4       | 120.38 | C2-C3-C4       | 120.40 |
| C2-C3-C1'      | 118.77 | C2-C3-C1'      | 118.78 | C2-C3-C1'      | 118.80 | C2-C3-C1'      | 117.76 | C2-C3-C1'      | 117.78 |
| C3-C4-O4       | 123.83 | C3-C4-O4       | 123.87 | C3-C4-O4       | 123.89 | C3-C4-O4       | 123.82 | C3-C4-O4       | 123.86 |
| C3-C1'-N1'     | 118.11 | C3-C1'-N1'     | 118.21 | C3-C1'-N1'     | 118.14 | C3-C1'-N1'     | 118.09 | C3-C1'-N1'     | 118.18 |
| C3-C1'-C2'     | 123.92 | C3-C1'-C2'     | 123.87 | C3-C1'-C2'     | 123.84 | C3-C1'-C2'     | 123.91 | C3-C1'-C2'     | 123.91 |
| C3-C4-C10      | 116.76 | C3-C4-C10      | 116.77 | C3-C4-C10      | 116.78 | C3-C4-C10      | 116.76 | C3-C4-C10      | 116.78 |
| C4-C10-C9      | 119.59 | C4-C10-C9      | 119.59 | C4-C10-C9      | 119.59 | C4-C10-C9      | 119.58 | C4-C10-C9      | 119.58 |
| O4-C4-C10      | 119.41 | O4-C4-C10      | 119.36 | O4-C4-C10      | 119.32 | O4-C4-C10      | 119.42 | O4-C4-C10      | 119.36 |
| C4-C10-C5      | 121.32 | C4-C10-C5      | 121.31 | C4-C10-C5      | 121.31 | C4-C10-C5      | 121.35 | C4-C10-C5      | 121.35 |
| C10-C5-C6      | 120.34 | C10-C5-C6      | 120.34 | C10-C5-C6      | 120.34 | C10-C5-C6      | 120.34 | C10-C5-C6      | 120.35 |
| C10-C9-C8      | 121.30 | C10-C9-C8      | 121.30 | C10-C9-C8      | 121.34 | C10-C9-C8      | 121.32 | C10-C9-C8      | 121.31 |
| C5-C6-C7       | 119.66 | C5-C6-C7       | 119.67 | C5-C6-C7       | 119.68 | C5-C6-C7       | 119.67 | C5-C6-C7       | 119.67 |
| C5-C10-C9      | 119.09 | C5-C10-C9      | 119.07 | C5-C10-C9      | 119.06 | C5-C10-C9      | 119.07 | C5-C10-C9      | 119.07 |
| C6-C7-C8       | 120.77 | C6-C7-C8       | 120.76 | C6-C7-C8       | 120.76 | C6-C7-C8       | 120.75 | C6-C7-C8       | 120.75 |

|                |        |                |        |                |        |                |        |                |        |
|----------------|--------|----------------|--------|----------------|--------|----------------|--------|----------------|--------|
| C7-C8-C9       | 118.84 | C7-C8-C9       | 118.84 | C7-C8-C9       | 118.83 | C7-C8-C9       | 118.84 | C7-C8-C9       | 118.85 |
| C1'-N1'-N7''   | 123.15 | C1'-N1'-N7''   | 123.10 | C1'-N1'-N7''   | 123.08 | C1'-N1'-N7''   | 123.12 | C1'-N1'-N7''   | 123.11 |
| N1'-N7''-C7''  | 118.96 | N1'-N7''-C7''  | 118.86 | N1'-N7''-C7''  | 118.71 | N1'-N7''-C7''  | 119.30 | N1'-N7''-C7''  | 118.83 |
| N7''-C7''-O7'' | 120.18 | N7''-C7''-O7'' | 121.18 | N7''-C7''-O7'' | 121.17 | N7''-C7''-O7'' | 120.44 | N7''-C7''-O7'' | 121.31 |
| N7''-C7''-C1'' | 116.91 | N7''-C7''-C1'' | 115.09 | N7''-C7''-C1'' | 115.03 | N7''-C7''-C1'' | 116.86 | N7''-C7''-C1'' | 114.93 |
| C7''-C1''-C2'' | 118.38 | C7''-C1''-C2'' | 117.61 | C7''-C1''-C2'' | 122.09 | C7''-C1''-C6'' | 123.25 | C7''-C1''-C2'' | 122.20 |
| C7''-C1''-C6'' | 122.63 | C7''-C1''-C6'' | 123.08 | C7''-C1''-C6'' | 117.56 | C7''-C1''-C2'' | 117.46 | C7''-C1''-C6'' | 117.72 |
| C1''-C2''-C3'' | 119.56 | C1''-C2''-C3'' | 120.65 | C1''-C2''-C3'' | 119.36 | C1''-C2''-C3'' | 119.83 | C1''-C2''-C3'' | 119.58 |
| C1''-C6''-C5'' | 121.12 | C1''-C6''-C5'' | 120.46 | C1''-C6''-C5'' | 120.21 | C1''-C6''-C5'' | 120.31 | C1''-C6''-C5'' | 120.20 |
| C2''-C3''-C4'' | 120.30 | C2''-C3''-C4'' | 119.55 | C2''-C3''-C4'' | 120.09 | C2''-C3''-C4'' | 120.18 | C2''-C3''-C4'' | 120.26 |
| C3''-C4''-C5'' | 120.70 | C3''-C4''-C5'' | 120.31 | C3''-C4''-C5'' | 120.19 | C3''-C4''-C5'' | 120.07 | C3''-C4''-C5'' | 119.95 |
| C4''-C5''-C6'' | 119.28 | C4''-C5''-C6'' | 119.71 | C4''-C5''-C6'' | 119.80 | C4''-C5''-C6'' | 120.31 | C4''-C5''-C6'' | 119.92 |
| O2''-C2''-C3'' | 117.30 | O4''-C4''-C3'' | 122.42 | O4''-C4''-C3'' | 119.71 | O2''-C2''-C3'' | 115.24 | O4''-C4''-C3'' | 120.14 |
| O2''-C2''-C1'' | 123.14 | O4''-C4''-C5'' | 117.26 | O4''-C4''-C5'' | 120.09 | O2''-C2''-C1'' | 124.92 | O4''-C4''-C5'' | 119.91 |
|                |        |                |        | C8''-O3''-C3'' | 117.92 | O3''-C3''-C4'' | 120.30 | O3''-C3''-C4'' | 114.74 |
|                |        |                |        | O3''-C3''-C4'' | 113.85 | O3''-C3''-C2'' | 119.52 | O3''-C3''-C2'' | 124.99 |
|                |        |                |        | O3''-C3''-C2'' | 126.06 |                |        |                |        |

Table S10: Dihedral angles of the investigated coumarin-hydroxybenzohydrazide derivatives

| 3a                  |         | 3b                  |         | 3c                  |         | 3d                  |         | 3e                  |         |
|---------------------|---------|---------------------|---------|---------------------|---------|---------------------|---------|---------------------|---------|
| Dihedral angle (°)  | M062X   |
| O1-C2-C3-C1'        | 178.81  | O1-C2-C3-C1'        | 178.31  | O1-C2-C3-C1'        | 179.06  | O1-C2-C3-C1'        | 179.12  | O1-C2-C3-C1'        | 178.36  |
| O2-C2-C3-C1'        | 1.49    | O2-C2-C3-C1'        | -2.10   | O2-C2-C3-C1'        | -1.16   | O2-C2-C3-C1'        | -1.22   | O2-C2-C3-C1'        | -2.04   |
| O1-C2-C3-C4         | -2.91   | O1-C2-C3-C4         | -3.68   | O1-C2-C3-C4         | -2.82   | O1-C2-C3-C4         | -2.58   | O1-C2-C3-C4         | -3.56   |
| C2-C3-C1'-N1'       | 177.60  | C2-C3-C1'-N1'       | 176.19  | C2-C3-C1'-N1'       | 177.56  | C2-C3-C1'-N1'       | 177.83  | C2-C3-C1'-N1'       | 176.20  |
| C2-C3-C4-O4         | -178.21 | C2-C3-C4-O4         | -177.60 | C2-C3-C4-O4         | -178.42 | C2-C3-C4-O4         | -178.20 | C2-C3-C4-O4         | -177.72 |
| C2-C3-C1'-C2'       | -3.01   | C2-C3-C1'-C2'       | -4.54   | C2-C3-C1'-C2'       | -3.04   | C2-C3-C1'-C2'       | -2.82   | C2-C3-C1'-C2'       | -4.50   |
| C2-C3-C4-C10        | 2.09    | C2-C3-C4-C10        | 2.81    | C2-C3-C4-C10        | 1.74    | C2-C3-C4-C10        | 2.05    | C2-C3-C4-C10        | 2.63    |
| C3-C1'-N1'-N7''     | -172.82 | C3-C1'-N1'-N7''     | -172.94 | C3-C1'-N1'-N7''     | -172.39 | C3-C1'-N1'-N7''     | -172.80 | C3-C1'-N1'-N7''     | -172.93 |
| C4-C10-C5-C6        | -179.52 | C4-C10-C5-C6        | -179.62 | C4-C10-C5-C6        | -179.65 | C4-C10-C5-C6        | -179.56 | C4-C10-C5-C6        | -179.73 |
| C4-C10-C9-C8        | 179.45  | C4-C10-C9-C8        | 179.54  | C4-C10-C9-C8        | 179.58  | C4-C10-C9-C8        | 179.55  | C4-C10-C9-C8        | 179.68  |
| C10-C5-C6-C7        | 0.04    | C10-C5-C6-C7        | 0.06    | C10-C5-C6-C7        | 0.06    | C10-C5-C6-C7        | 0.01    | C10-C5-C6-C7        | 0.04    |
| C10-C9-C8-C7        | 0.11    | C10-C9-C8-C7        | 0.12    | C10-C9-C8-C7        | 0.11    | C10-C9-C8-C7        | 0.04    | C10-C9-C8-C7        | 0.05    |
| C5-C6-C7-C8         | -0.05   | C5-C6-C7-C8         | -0.02   | C5-C6-C7-C8         | -0.06   | C5-C6-C7-C8         | -0.03   | C5-C6-C7-C8         | -0.01   |
| C6-C7-C8-C9         | -0.02   | C6-C7-C8-C9         | -0.07   | C6-C7-C8-C9         | -0.02   | C6-C7-C8-C9         | 0.01    | C6-C7-C8-C9         | 0.04    |
| C7-C8-C9-O1         | -179.69 | C7-C8-C9-O1         | -179.59 | C7-C8-C9-O1         | -179.63 | C7-C8-C9-O1         | -179.80 | C7-C8-C9-O1         | -179.63 |
| C9-C10-C4-O4        | -179.99 | C9-C10-C4-O4        | -179.78 | C9-C10-C4-O4        | -179.84 | C9-C10-C4-O4        | 179.76  | C9-C10-C4-O4        | 179.79  |
| C1'-N1'-N7''-C7''   | 76.51   | C1'-N1'-N7''-C7''   | 75.27   | C1'-N1'-N7''-C7''   | 74.71   | C1'-N1'-N7''-C7''   | 75.26   | C1'-N1'-N7''-C7''   | 75.00   |
| N1'-N7''-C7''-O1''  | -7.73   | N1'-N7''-C7''-O7''  | -8.49   | N1'-N7''-C7''-O7''  | -8.71   | N1'-N7''-C7''-O7''  | -6.50   | N1'-N7''-C7''-O7''  | -8.59   |
| N1'-N7''-C7''-C1''  | 173.67  | N1'-N7''-C7''-C1''  | 173.37  | N1'-N7''-C7''-C1''  | 173.12  | N1'-N7''-C7''-C1''  | 175.13  | N1'-N7''-C7''-C1''  | 173.19  |
| N7''-C7''-C1''-C6'' | 14.01   | N7''-C7''-C1''-C6'' | 22.74   | N7''-C7''-C1''-C6'' | -155.92 | N7''-C7''-C1''-C6'' | 12.72   | N7''-C7''-C1''-C6'' | -156.05 |
| N7''-C7''-C1''-C2'' | -166.20 | N7''-C7''-C1''-C2'' | -158.36 | N7''-C7''-C1''-C2'' | -24.66  | N7''-C7''-C1''-C2'' | -168.01 | N7''-C7''-C1''-C2'' | 24.54   |
| C7''-C1''-C2''-O2'' | -1.80   | C7''-C1''-C6''-C5'' | -179.55 | C7''-C1''-C6''-C5'' | -179.46 | C7''-C1''-C6''-C5'' | -179.51 | C7''-C1''-C6''-C5'' | 179.39  |
| C7''-C1''-C6''-C5'' | -178.60 | C7''-C1''-C2''-C3'' | 179.85  | C7''-C1''-C2''-C3'' | 179.95  | C7''-C1''-C2''-C3'' | 178.93  | C7''-C1''-C2''-C3'' | -179.84 |
| C7''-C1''-C2''-C3'' | 177.76  | C1''-C2''-C3''-C4'' | 0.79    | C1''-C2''-C3''-C4'' | 0.31    | C1''-C2''-C3''-C4'' | 1.14    | C1''-C2''-C3''-C4'' | 0.10    |
| C1''-C2''-C3''-C4'' | 1.57    | C1''-C6''-C5''-C4'' | 0.26    | C1''-C6''-C5''-C4'' | 0.79    | C1''-C6''-C5''-C4'' | -0.04   | C1''-C6''-C5''-C4'' | 0.74    |

|                     |         |                     |        |                     |         |                     |         |                     |         |
|---------------------|---------|---------------------|--------|---------------------|---------|---------------------|---------|---------------------|---------|
| C1''-C6''-C5''-C4'' | 0.14    | C6''-C5''-C4''-C3'' | -0.69  | C6''-C5''-C4''-C3'' | -0.06   | C6''-C5''-C4''-C3'' | -0.61   | C6''-C5''-C4''-C3'' | 0.13    |
| O2''-C2''-C3''-C4'' | -178.85 | C2''-C3''-C4''-C5'' | 0.16   | C2''-C3''-C4''-C5'' | 0.62    | C2''-C3''-C4''-C5'' | 0.64    | C2''-C3''-C4''-C5'' | -0.55   |
| O2''-C2''-C1''-C6'' | 178.01  | O4''-C4''-C3''-C2'' | 179.85 | O4''-C4''-C3''-C2'' | 179.84  | O2''-C2''-C3''-C4'' | -179.19 | O3''-C3''-C2''-C1'' | -179.19 |
| C6''-C5''-C4''-C3'' | -1.06   | O4''-C4''-C5''-C6'' | 179.85 | O4''-C4''-C5''-C6'' | 179.60  | O2''-C2''-C1''-C7'' | -0.71   | O3''-C3''-C4''-C5'' | 178.81  |
| C2''-C3''-C4''-C5'' | 0.20    |                     |        | C8''-O3''-C3''-C2'' | -0.08   | O3''-C3''-C2''-C1'' | -179.36 | O4''-C4''-C3''-C2'' | 179.86  |
|                     |         |                     |        | C8''-O3''-C3''-C4'' | -179.48 | O3''-C3''-C2''-O2'' | 0.31    | O3''-C3''-C4''-O4'' | -0.78   |
|                     |         |                     |        | O3''-C3''-C4''-C5'' | 178.82  | O3''-C3''-C4''-C5'' | -179.43 | O4''-C4''-C5''-C6'' | 179.72  |
|                     |         |                     |        | O3''-C3''-C2''-C1'' | -179.05 |                     |         |                     |         |
|                     |         |                     |        | O3''-C3''-C4''-O4'' | -0.72   |                     |         |                     |         |

Optimized geometries of investigated compounds and radicals, anions and radical cations in methanol.

## Ground states

### 3a

$H(\text{UM06-2X}) = -1179.556536 \text{ Ha}$

Charge = 0; Multiplicity = 1

|   |             |             |             |
|---|-------------|-------------|-------------|
| C | 2.52911600  | 1.77958600  | -0.12612600 |
| C | 4.45974600  | 0.34037800  | -0.22830700 |
| C | 3.73615900  | -0.79105000 | 0.12478200  |
| C | 2.29348500  | -0.67530000 | 0.40055400  |
| C | 1.71124800  | 0.64787600  | 0.28777800  |
| H | 6.35915700  | 1.17658700  | -0.75763200 |
| C | 5.82692100  | 0.27385900  | -0.48561500 |
| C | 4.39875900  | -2.02027600 | 0.21995200  |
| C | 5.75553900  | -2.10388700 | -0.03374700 |
| C | 6.46663600  | -0.95075200 | -0.38651000 |
| H | 3.82162200  | -2.89390900 | 0.49716400  |
| H | 6.26708200  | -3.05509000 | 0.04081900  |
| O | 3.86977100  | 1.56351600  | -0.34374900 |
| O | 2.16141300  | 2.91529800  | -0.31130800 |
| O | 1.65095200  | -1.68734500 | 0.71560100  |
| C | 0.33102100  | 0.85912500  | 0.54110700  |
| C | -0.33438600 | 2.19516700  | 0.47214800  |
| H | -0.34339500 | 2.54224900  | -0.56224900 |
| H | -1.34995700 | 2.14007400  | 0.85222500  |
| H | 0.24301200  | 2.91988200  | 1.04199900  |
| N | -0.41350800 | -0.19192200 | 0.87083200  |
| H | 0.04885300  | -1.11097600 | 0.88074100  |
| N | -1.78199400 | -0.13419100 | 0.99825900  |
| C | -2.55384900 | -0.10584200 | -0.13483200 |
| H | -2.14531400 | -0.46808100 | 1.87939300  |
| C | -4.01970200 | -0.18936500 | 0.05101200  |
| C | -4.82353100 | -0.45982100 | -1.07498300 |
| C | -4.63605100 | -0.00619100 | 1.29881900  |
| C | -6.20665800 | -0.59080600 | -0.91949500 |
| C | -6.00584300 | -0.11932000 | 1.44236400  |
| H | -4.04275400 | 0.25880100  | 2.16611200  |

|   |             |             |             |
|---|-------------|-------------|-------------|
| C | -6.78776200 | -0.42435200 | 0.32408700  |
| O | -2.02749300 | 0.01109000  | -1.23698300 |
| H | 7.52991400  | -1.01142100 | -0.58530400 |
| H | -7.86233700 | -0.52082500 | 0.42646700  |
| H | -6.46557400 | 0.03302200  | 2.41005700  |
| H | -6.80113900 | -0.81434500 | -1.79687700 |
| O | -4.32520000 | -0.61066500 | -2.31468800 |
| H | -3.37130300 | -0.40251600 | -2.28546300 |

### 3b

$H(\text{UM06-2X}) = -1179.553752 \text{ Ha}$

Charge = 0; Multiplicity = 1

|   |             |             |             |
|---|-------------|-------------|-------------|
| C | 2.71526300  | 1.76068800  | -0.08144600 |
| C | 4.65493300  | 0.33313100  | -0.18189100 |
| C | 3.92215700  | -0.81570500 | 0.08547500  |
| C | 2.46932100  | -0.71607100 | 0.31136300  |
| C | 1.88911400  | 0.60980200  | 0.25107000  |
| H | 6.56934100  | 1.19807500  | -0.59795900 |
| C | 6.03099600  | 0.28169300  | -0.39149100 |
| C | 4.58477700  | -2.04713800 | 0.14266400  |
| C | 5.95026900  | -2.11597200 | -0.06482100 |
| C | 6.67039800  | -0.94562500 | -0.33204800 |
| H | 4.00104000  | -2.93450600 | 0.35467200  |
| H | 6.46194300  | -3.06895800 | -0.01986800 |
| O | 4.06513400  | 1.55934400  | -0.25783100 |
| O | 2.34940400  | 2.90242900  | -0.23232800 |
| O | 1.81839400  | -1.74528000 | 0.54569500  |
| C | 0.49862300  | 0.80650600  | 0.47233200  |
| C | -0.16191500 | 2.14687200  | 0.48063500  |
| H | -0.18041200 | 2.54730900  | -0.53431400 |
| H | -1.17552800 | 2.07021200  | 0.86330300  |
| H | 0.42093100  | 2.83828300  | 1.08447100  |
| N | -0.25758400 | -0.26008300 | 0.69888500  |
| H | 0.20394200  | -1.17851000 | 0.66477100  |
| N | -1.62986000 | -0.20377700 | 0.78536700  |
| C | -2.36666000 | -0.06072900 | -0.37640300 |
| H | -2.02037900 | -0.67412300 | 1.58970900  |
| C | -3.83962100 | -0.16379500 | -0.20544500 |
| C | -4.60011500 | -0.49014100 | -1.32956200 |
| C | -4.48495100 | 0.07180600  | 1.01260600  |
| C | -5.97763800 | -0.60573500 | -1.24096200 |
| H | -4.09919800 | -0.66014600 | -2.27489400 |
| C | -5.86277400 | -0.03068700 | 1.10851200  |
| H | -3.92450800 | 0.36982300  | 1.89126900  |
| C | -6.61063800 | -0.37693400 | -0.01768500 |
| O | -1.82614400 | 0.16737700  | -1.43973700 |
| O | -7.95262900 | -0.47085000 | 0.13390800  |
| H | -8.36966000 | -0.71140100 | -0.70070500 |
| H | 7.74039500  | -0.99483800 | -0.49467700 |
| H | -6.56400200 | -0.87115300 | -2.11394200 |



|   |             |            |            |
|---|-------------|------------|------------|
| H | -6.37432500 | 0.16099100 | 2.04330900 |
|---|-------------|------------|------------|

### 3c

$H(\text{UM06-2X}) = -1294.033856 \text{ Ha}$

Charge = 0; Multiplicity = 1

|   |             |             |             |
|---|-------------|-------------|-------------|
| C | -3.31078000 | 1.60202700  | 0.72521100  |
| C | -5.18876400 | 0.12330000  | 0.41090000  |
| C | -4.44225400 | -0.80211900 | -0.30568000 |
| C | -3.01726800 | -0.53749200 | -0.57206100 |
| C | -2.47709300 | 0.70510300  | -0.06111200 |
| H | -7.09204600 | 0.66232700  | 1.23137000  |
| C | -6.54193600 | -0.08220600 | 0.66986400  |
| C | -5.06653400 | -1.96470100 | -0.77226100 |
| C | -6.40877500 | -2.18498600 | -0.52266300 |
| C | -7.14389900 | -1.23781700 | 0.19977500  |
| H | -4.47144100 | -2.67656700 | -1.33098900 |
| H | -6.89049500 | -3.08432500 | -0.88472000 |
| O | -4.63541200 | 1.26938400  | 0.89706800  |
| O | -2.97223000 | 2.62873400  | 1.26516800  |
| O | -2.35568300 | -1.36736300 | -1.21417800 |
| C | -1.11496700 | 1.05011000  | -0.27999700 |
| C | -0.49420400 | 2.32803400  | 0.18200200  |
| H | -1.13813400 | 3.16466500  | -0.07779500 |
| H | -0.40992700 | 2.31436500  | 1.26999100  |
| H | 0.49041400  | 2.45508300  | -0.25905900 |
| N | -0.35117100 | 0.19133500  | -0.94289400 |
| H | -0.78377300 | -0.69919400 | -1.22498900 |
| N | 1.00790700  | 0.35025900  | -1.08919700 |
| C | 1.82801400  | 0.10944800  | -0.00247000 |
| H | 1.34912400  | 0.21364500  | -2.03033000 |
| C | 3.28610400  | 0.14104100  | -0.29383000 |
| C | 4.12441800  | -0.52371900 | 0.61187500  |
| C | 3.82409800  | 0.80775800  | -1.39018400 |
| C | 5.48935700  | -0.53452500 | 0.39748400  |
| H | 3.68202300  | -1.02307900 | 1.46360200  |
| C | 5.20081200  | 0.80513800  | -1.59871900 |
| H | 3.19364900  | 1.36473000  | -2.07248500 |
| C | 6.03193900  | 0.13493400  | -0.71745200 |
| O | 1.36561900  | -0.07624800 | 1.10526500  |
| O | 7.36709000  | 0.12559100  | -0.91987600 |
| H | 7.78310800  | -0.37885600 | -0.20713700 |
| O | 6.41617600  | -1.14591500 | 1.17707300  |
| H | -8.19589500 | -1.40637900 | 0.39660300  |
| C | 5.95415100  | -1.84407000 | 2.32753400  |
| H | 5.44862000  | -1.16024100 | 3.01347100  |
| H | 5.27744800  | -2.65175000 | 2.03898200  |
| H | 6.83910300  | -2.25709800 | 2.80367500  |
| H | 5.64207300  | 1.32651400  | -2.43900000 |

### 3d

$H(\text{UM06-2X}) = -1254.779242 \text{ Ha}$

Charge = 0; Multiplicity = 1

|   |             |             |             |
|---|-------------|-------------|-------------|
| C | -2.76659300 | 1.68436200  | -0.52047300 |
| C | -4.76293000 | 0.49309000  | 0.11431900  |
| C | -4.10140100 | -0.72231700 | 0.22597300  |
| C | -2.65826500 | -0.79501100 | -0.06331400 |
| C | -2.01144500 | 0.43875500  | -0.47082300 |
| H | -6.60993200 | 1.56539900  | 0.26867600  |
| C | -6.12831800 | 0.60067200  | 0.36720700  |
| C | -4.82642900 | -1.85919100 | 0.60250400  |
| C | -6.18245200 | -1.76955400 | 0.85809900  |
| C | -6.83017300 | -0.53430700 | 0.73831500  |
| H | -4.29739900 | -2.80078000 | 0.68462900  |
| H | -6.74270900 | -2.64935500 | 1.14820800  |
| O | -4.11217200 | 1.63616800  | -0.24236100 |
| O | -2.33958500 | 2.78438600  | -0.77803900 |
| O | -2.07094200 | -1.88056800 | 0.04160400  |
| C | -0.63291100 | 0.46370300  | -0.79892100 |
| C | 0.08809800  | 1.68371600  | -1.27202700 |
| H | 0.15634700  | 2.40229300  | -0.45404700 |
| H | 1.08400300  | 1.43463300  | -1.62575500 |
| H | -0.48327400 | 2.16085900  | -2.06528700 |
| N | 0.05702300  | -0.67124500 | -0.69911800 |
| H | -0.44185700 | -1.49990700 | -0.35258400 |
| N | 1.41787300  | -0.74954900 | -0.86703100 |
| C | 2.25436400  | -0.25020800 | 0.08694200  |
| H | 1.74499400  | -1.20789100 | -1.70411400 |
| C | 3.70791200  | -0.46288800 | -0.11090600 |
| C | 4.58422000  | 0.25783300  | 0.71056700  |
| C | 4.23678700  | -1.34327500 | -1.07041400 |
| C | 5.97273900  | 0.11554100  | 0.54768600  |
| C | 5.60367400  | -1.47893900 | -1.21668800 |
| H | 3.58658200  | -1.94724700 | -1.69026600 |
| C | 6.47565900  | -0.74358200 | -0.40973900 |
| O | 1.80099300  | 0.37677500  | 1.04155200  |
| O | 6.81328500  | 0.82517800  | 1.34020200  |
| H | 6.28746100  | 1.34653500  | 1.96138200  |
| H | -7.89264600 | -0.46019300 | 0.93686500  |
| O | 4.20425300  | 1.11564700  | 1.67914300  |
| H | 3.22864300  | 1.07326900  | 1.75314400  |
| H | 6.00348000  | -2.16371800 | -1.95313800 |
| H | 7.55016100  | -0.83943700 | -0.51132800 |

**3e**

$H(\text{UM06-2X}) = -1254.775512 \text{ Ha}$

Charge = 0; Multiplicity = 1

|   |            |             |             |
|---|------------|-------------|-------------|
| C | 2.99664200 | 1.75796400  | -0.13712000 |
| C | 4.94173600 | 0.33463400  | -0.11980500 |
| C | 4.20253000 | -0.80727600 | 0.15909200  |
| C | 2.74237100 | -0.70524500 | 0.32815100  |

|   |             |             |             |
|---|-------------|-------------|-------------|
| C | 2.16129100  | 0.61536700  | 0.20087900  |
| H | 6.86752500  | 1.19158100  | -0.49824000 |
| C | 6.32432600  | 0.28074400  | -0.28024500 |
| C | 4.86560900  | -2.03397000 | 0.27984600  |
| C | 6.23761100  | -2.10504600 | 0.12252800  |
| C | 6.96412600  | -0.94173500 | -0.15803800 |
| H | 4.27667900  | -2.91598700 | 0.49975900  |
| H | 6.74903000  | -3.05458200 | 0.21678900  |
| O | 4.35269300  | 1.55580700  | -0.25589700 |
| O | 2.63400000  | 2.89304800  | -0.33819000 |
| O | 2.08571200  | -1.72837800 | 0.57316900  |
| C | 0.76275500  | 0.81372500  | 0.36213100  |
| C | 0.09794100  | 2.15051400  | 0.30090700  |
| H | 0.11366200  | 2.51537000  | -0.72751300 |
| H | -0.92842700 | 2.08221800  | 0.64979400  |
| H | 0.65630400  | 2.86549900  | 0.90023000  |
| N | 0.00186000  | -0.24827800 | 0.59444400  |
| H | 0.46772200  | -1.16533400 | 0.60813200  |
| N | -1.37299400 | -0.19566000 | 0.62629700  |
| C | -2.06435400 | -0.08812700 | -0.56705700 |
| H | -1.79233800 | -0.65468500 | 1.42301500  |
| C | -3.54288400 | -0.19737500 | -0.44707800 |
| C | -4.21948900 | 0.10572800  | 0.74088000  |
| C | -4.25566800 | -0.60520300 | -1.57169200 |
| C | -5.59584200 | -0.01803400 | 0.79326000  |
| H | -3.69166500 | 0.47412100  | 1.61400000  |
| C | -5.63694500 | -0.73687500 | -1.51347900 |
| H | -3.72104900 | -0.82745200 | -2.48633900 |
| C | -6.31083000 | -0.44659400 | -0.33562100 |
| O | -1.48608700 | 0.11402000  | -1.61492800 |
| O | -7.65580400 | -0.56949900 | -0.28069700 |
| H | -7.95908400 | -0.32934900 | 0.60494800  |
| O | -6.36420200 | 0.26168100  | 1.88216100  |
| H | -5.82760800 | 0.52823800  | 2.63633400  |
| H | 8.03927400  | -0.99273700 | -0.28193000 |
| H | -6.20812800 | -1.06194300 | -2.37434900 |

## Radicals

### 3aC2”O•

$H(\text{UM06-2X}) = -1178.910820 \text{ Ha}$

Charge = 0; Multiplicity = 2

|   |             |             |             |
|---|-------------|-------------|-------------|
| C | -2.52102800 | 1.75398800  | 0.32954000  |
| C | -4.46651300 | 0.33676900  | 0.21105600  |
| C | -3.73636100 | -0.76926200 | -0.20294500 |
| C | -2.28130100 | -0.64799000 | -0.40023000 |
| C | -1.69624200 | 0.65637400  | -0.15688200 |
| H | -6.38164500 | 1.14894000  | 0.72032900  |
| C | -5.84497000 | 0.26583200  | 0.39716000  |
| C | -4.40407000 | -1.97765900 | -0.43340100 |

|   |             |             |             |
|---|-------------|-------------|-------------|
| C | -5.77207500 | -2.06553400 | -0.25192700 |
| C | -6.48971100 | -0.93769600 | 0.16364000  |
| H | -3.82126300 | -2.83218500 | -0.75482200 |
| H | -6.28713300 | -3.00078800 | -0.43059700 |
| O | -3.87265200 | 1.53751300  | 0.46221200  |
| O | -2.15003000 | 2.85967500  | 0.64452500  |
| O | -1.63194900 | -1.63845200 | -0.76543600 |
| C | -0.30922100 | 0.87965900  | -0.35562100 |
| C | 0.35630500  | 2.20547500  | -0.17747400 |
| H | -0.22851200 | 2.97998500  | -0.66738800 |
| H | 0.38886800  | 2.45275600  | 0.88509500  |
| H | 1.36522700  | 2.18517000  | -0.57866000 |
| N | 0.44287300  | -0.14821800 | -0.73896500 |
| H | -0.02047000 | -1.06163900 | -0.83054800 |
| N | 1.81267200  | -0.08774400 | -0.83666900 |
| C | 2.57987800  | -0.06761100 | 0.30282500  |
| C | 4.04987300  | -0.10268700 | 0.02974400  |
| C | 4.86510300  | -1.09315600 | 0.73081200  |
| C | 4.63027200  | 0.79812600  | -0.82516500 |
| C | 6.29653600  | -1.04458100 | 0.49635100  |
| C | 6.02672600  | 0.80141100  | -1.02055800 |
| H | 4.02239200  | 1.53118500  | -1.34373900 |
| C | 6.84852500  | -0.12144600 | -0.35358100 |
| O | 2.10021300  | 0.03729300  | 1.40927800  |
| H | -7.56177300 | -1.00186700 | 0.30652400  |
| H | 7.91844600  | -0.10110500 | -0.51883000 |
| H | 6.46464000  | 1.52871400  | -1.69223500 |
| H | 2.20765900  | -0.33868600 | -1.73317200 |
| O | 4.36116000  | -1.95605700 | 1.46830200  |
| H | 6.90044200  | -1.77858600 | 1.01637200  |

### 3aC7”N•

$H(\text{UM06-2X}) = -1178.916194 \text{ Ha}$

Charge = 0; Multiplicity = 2

|   |             |             |             |
|---|-------------|-------------|-------------|
| C | -2.86912800 | 1.92339500  | 0.03247500  |
| C | -4.50250400 | 0.15644500  | -0.01354000 |
| C | -3.54629400 | -0.85071900 | 0.00255600  |
| C | -2.11806900 | -0.50795700 | 0.02720500  |
| C | -1.78537700 | 0.92566600  | 0.01984000  |
| H | -6.57877900 | 0.67428000  | -0.05417800 |
| C | -5.86229300 | -0.13704500 | -0.04253000 |
| C | -3.96451900 | -2.18754000 | -0.00972500 |
| C | -5.31116400 | -2.49590700 | -0.03839600 |
| C | -6.25767200 | -1.46474100 | -0.05489400 |
| H | -3.20797200 | -2.96240700 | 0.00334800  |
| H | -5.63455700 | -3.52889000 | -0.04820700 |
| O | -4.16110200 | 1.47902400  | 0.00201700  |
| O | -2.72761200 | 3.11783100  | 0.06910100  |
| O | -1.26948400 | -1.39926900 | 0.04728500  |
| C | -0.46578100 | 1.38352000  | 0.00357400  |

|   |             |             |             |
|---|-------------|-------------|-------------|
| C | -0.04296300 | 2.81601200  | -0.02660100 |
| H | -0.51610100 | 3.32300400  | -0.86671900 |
| H | -0.39114900 | 3.31749300  | 0.87726800  |
| H | 1.03689000  | 2.88667900  | -0.09907500 |
| N | 0.52362400  | 0.44676000  | 0.01377600  |
| H | 0.23054400  | -0.54912300 | 0.03627100  |
| N | 1.79328000  | 0.75050900  | -0.00250200 |
| C | 2.58425800  | -0.40400400 | 0.01505900  |
| C | 4.03082200  | -0.16053600 | -0.00424600 |
| C | 4.91738600  | -1.25972200 | 0.00740000  |
| C | 4.55651400  | 1.14387100  | -0.03401000 |
| C | 6.29680900  | -1.03343500 | -0.01113600 |
| C | 5.91987500  | 1.35811900  | -0.05173700 |
| H | 3.86823100  | 1.97888400  | -0.04280800 |
| C | 6.78748400  | 0.25909300  | -0.04015100 |
| O | 2.08800500  | -1.53247800 | 0.04478700  |
| H | -7.31444400 | -1.70240000 | -0.07726700 |
| H | 7.85934200  | 0.41864300  | -0.05398500 |
| H | 6.31379200  | 2.36572800  | -0.07454700 |
| H | 6.95863200  | -1.89064400 | -0.00216900 |
| O | 4.49905400  | -2.53521900 | 0.03553000  |
| H | 3.52205600  | -2.53833100 | 0.04652700  |

### 3bC4”O•

$H(\text{UM06-2X}) = -1178.912715 \text{ Ha}$

Charge = 0; Multiplicity = 2

|   |             |             |             |
|---|-------------|-------------|-------------|
| C | -2.65469900 | 1.75987300  | 0.09403700  |
| C | -4.60085000 | 0.34096900  | 0.18268000  |
| C | -3.87405200 | -0.81017200 | -0.09154100 |
| C | -2.42079200 | -0.71722300 | -0.31411400 |
| C | -1.83339900 | 0.60619100  | -0.24500600 |
| H | -6.51095300 | 1.21329900  | 0.60282700  |
| C | -5.97725300 | 0.29554200  | 0.39059900  |
| C | -4.54321500 | -2.03766800 | -0.15807300 |
| C | -5.90926900 | -2.10031900 | 0.04709000  |
| C | -6.62317500 | -0.92788200 | 0.32179000  |
| H | -3.96406700 | -2.92676800 | -0.37529400 |
| H | -6.42612300 | -3.05011100 | -0.00524700 |
| O | -4.00487400 | 1.56397000  | 0.26743900  |
| O | -2.28164000 | 2.89781300  | 0.25273200  |
| O | -1.77397500 | -1.74744000 | -0.55336500 |
| C | -0.44432700 | 0.79712600  | -0.46431800 |
| C | 0.22458800  | 2.13320400  | -0.46671100 |
| H | -0.35645200 | 2.83191500  | -1.06375100 |
| H | 0.25024500  | 2.52723000  | 0.55064700  |
| H | 1.23589500  | 2.05529500  | -0.85553500 |
| N | 0.30572500  | -0.27550500 | -0.69651500 |
| H | -0.16206200 | -1.19198600 | -0.67085500 |
| N | 1.67762800  | -0.22995900 | -0.78072100 |
| C | 2.41212800  | -0.06794800 | 0.37029400  |

|   |             |             |             |
|---|-------------|-------------|-------------|
| C | 3.89278800  | -0.17559100 | 0.20076800  |
| C | 4.63747800  | -0.55895200 | 1.33785200  |
| C | 4.53507900  | 0.12233500  | -1.01930100 |
| C | 5.99608600  | -0.67956200 | 1.26148200  |
| H | 4.10765100  | -0.76109900 | 2.26041200  |
| C | 5.89670300  | 0.01889400  | -1.11827900 |
| H | 3.96121000  | 0.46206600  | -1.87336400 |
| C | 6.69616800  | -0.39785900 | 0.02039600  |
| O | 1.89390300  | 0.18265500  | 1.43743600  |
| O | 7.93318800  | -0.50351300 | -0.06479000 |
| H | -7.69359700 | -0.97233200 | 0.48289900  |
| H | 6.59133000  | -0.98292100 | 2.11427800  |
| H | 6.41918100  | 0.24969900  | -2.03857600 |
| H | 2.07152600  | -0.66966800 | -1.60126700 |

### 3bC7”N•

$H(\text{UM06-2X}) = -1178.922555 \text{ Ha}$

Charge = 0; Multiplicity =2

|   |             |             |             |
|---|-------------|-------------|-------------|
| C | -2.97689000 | 1.90417800  | 0.04229000  |
| C | -4.67499600 | 0.20027800  | -0.03443000 |
| C | -3.75750300 | -0.84147500 | 0.00180300  |
| C | -2.31727500 | -0.55085800 | 0.05606200  |
| C | -1.93226800 | 0.86740300  | 0.04102600  |
| H | -6.72902100 | 0.79557600  | -0.11966500 |
| C | -6.04397600 | -0.04218000 | -0.09386500 |
| C | -4.22531200 | -2.16142800 | -0.02167400 |
| C | -5.58167200 | -2.41955200 | -0.08137400 |
| C | -6.48870000 | -1.35398600 | -0.11741900 |
| H | -3.49828900 | -2.96362100 | 0.00720100  |
| H | -5.94274000 | -3.43975500 | -0.10045400 |
| O | -4.28520300 | 1.50861500  | -0.00819900 |
| O | -2.79349000 | 3.09313400  | 0.08730100  |
| O | -1.50448900 | -1.47446500 | 0.10187100  |
| C | -0.59432400 | 1.27511600  | 0.02542500  |
| C | -0.12116200 | 2.69149200  | -0.02446700 |
| H | -0.58395400 | 3.20670800  | -0.86518000 |
| H | -0.44195200 | 3.21440700  | 0.87748500  |
| H | 0.95976200  | 2.72238900  | -0.10749300 |
| N | 0.36073900  | 0.30620900  | 0.05248600  |
| H | 0.03695700  | -0.67879400 | 0.09267000  |
| N | 1.64168800  | 0.56048900  | 0.02658500  |
| C | 2.38717700  | -0.63773800 | 0.06569300  |
| C | 3.84754300  | -0.43514300 | 0.02111400  |
| C | 4.67573300  | -1.56197500 | 0.04608500  |
| C | 4.42578200  | 0.83925600  | -0.04741400 |
| C | 6.05188200  | -1.42820100 | 0.00372900  |
| H | 4.22608800  | -2.54603800 | 0.09951400  |
| C | 5.80117600  | 0.98264200  | -0.08941300 |
| H | 3.79287100  | 1.71691000  | -0.06724400 |
| C | 6.61668900  | -0.15086300 | -0.06402500 |

|   |             |             |             |
|---|-------------|-------------|-------------|
| O | 1.85372700  | -1.73345000 | 0.12961300  |
| O | 7.95309900  | 0.04772800  | -0.10785000 |
| H | 8.42129500  | -0.79414600 | -0.08085000 |
| H | -7.55271900 | -1.55203700 | -0.16407300 |
| H | 6.69187800  | -2.30371400 | 0.02111700  |
| H | 6.26225900  | 1.96095500  | -0.14330200 |

### 3cC4"O•

$H(\text{UM06-2X}) = -1293.394502 \text{ Ha}$

Charge = 0; Multiplicity = 2

|   |             |             |             |
|---|-------------|-------------|-------------|
| C | -3.34227800 | 1.68136900  | 0.47804700  |
| C | -5.23059900 | 0.18669100  | 0.38156200  |
| C | -4.48501100 | -0.85186100 | -0.15957100 |
| C | -3.05204000 | -0.65019000 | -0.43666700 |
| C | -2.50692000 | 0.65877700  | -0.13613100 |
| H | -7.13843500 | 0.87332600  | 1.06960700  |
| C | -6.59026500 | 0.04127200  | 0.64596400  |
| C | -5.11781900 | -2.06834800 | -0.44113900 |
| C | -6.46698100 | -2.22951700 | -0.18428200 |
| C | -7.20056000 | -1.16881100 | 0.36006000  |
| H | -4.52362500 | -2.86932500 | -0.86357800 |
| H | -6.95572500 | -3.17055100 | -0.40221600 |
| O | -4.67085800 | 1.39133400  | 0.68547900  |
| O | -2.99868200 | 2.78025800  | 0.84408400  |
| O | -2.38744900 | -1.58201500 | -0.91366100 |
| C | -1.14275400 | 0.95465600  | -0.39615400 |
| C | -0.52174600 | 2.29390300  | -0.16613600 |
| H | -1.16535900 | 3.06964500  | -0.57374400 |
| H | -0.44226100 | 2.47688900  | 0.90671600  |
| H | 0.46358800  | 2.34360300  | -0.62040600 |
| N | -0.37553900 | -0.01178800 | -0.88930600 |
| H | -0.80915400 | -0.93578800 | -1.02040500 |
| N | 0.98514000  | 0.11568100  | -1.04430000 |
| C | 1.79237200  | 0.07145600  | 0.07050100  |
| C | 3.25898300  | 0.06963600  | -0.21338000 |
| C | 4.08047200  | -0.44569200 | 0.76529700  |
| C | 3.80467300  | 0.59067400  | -1.42467700 |
| C | 5.46870200  | -0.49725600 | 0.58691000  |
| H | 3.66121700  | -0.82692000 | 1.68845000  |
| C | 5.14674700  | 0.56317300  | -1.62988000 |
| H | 3.15767300  | 1.04038100  | -2.16814200 |
| C | 6.06905500  | 0.01232500  | -0.65484300 |
| O | 1.33403200  | 0.06957900  | 1.19324400  |
| O | 7.29405700  | -0.01860200 | -0.86307600 |
| O | 6.15055900  | -1.02345500 | 1.58877800  |
| H | -8.25782500 | -1.29142900 | 0.56247400  |
| C | 7.58186900  | -1.15159200 | 1.60350700  |
| H | 7.91386800  | -1.79198400 | 0.78923600  |
| H | 8.05146200  | -0.17354600 | 1.52105800  |
| H | 7.80063700  | -1.60537700 | 2.56620200  |

|   |            |             |             |
|---|------------|-------------|-------------|
| H | 5.59098800 | 0.96294300  | -2.53332900 |
| H | 1.33706100 | -0.12990400 | -1.95939200 |

### 3cC7"N•

$H(\text{UM06-2X}) = -1293.395122 \text{ Ha}$

Charge = 0; Multiplicity = 2

|   |             |             |             |
|---|-------------|-------------|-------------|
| C | -3.73220800 | 1.83309100  | 0.10790900  |
| C | -5.29969500 | 0.00625000  | 0.08004100  |
| C | -4.30868500 | -0.96151700 | -0.02112300 |
| C | -2.89488300 | -0.56222400 | -0.06629800 |
| C | -2.61535700 | 0.87991600  | 0.00780300  |
| H | -7.39125200 | 0.44309200  | 0.20855800  |
| C | -6.64678900 | -0.33868800 | 0.12774000  |
| C | -4.67878100 | -2.31137000 | -0.07769700 |
| C | -6.01230100 | -2.67087000 | -0.03169900 |
| C | -6.99440900 | -1.67845400 | 0.07135800  |
| H | -3.89599500 | -3.05551700 | -0.15836900 |
| H | -6.29807200 | -3.71407700 | -0.07498200 |
| O | -5.00676300 | 1.33855600  | 0.13661100  |
| O | -3.63764900 | 3.03169200  | 0.16972800  |
| O | -2.01543600 | -1.41855700 | -0.16058100 |
| C | -1.31256900 | 1.38723800  | -0.00690200 |
| C | -0.94608900 | 2.83438600  | 0.06288700  |
| H | -1.42547000 | 3.37353200  | -0.75386100 |
| H | -1.32895900 | 3.26554500  | 0.98835700  |
| H | 0.13091300  | 2.95066500  | 0.01271200  |
| N | -0.28711000 | 0.49544200  | -0.08768100 |
| H | -0.53507900 | -0.51031700 | -0.14782300 |
| N | 0.96944000  | 0.85159900  | -0.08348100 |
| C | 1.81105200  | -0.27609600 | -0.17093100 |
| C | 3.24968600  | 0.05401100  | -0.14712400 |
| C | 4.17236600  | -0.99652600 | -0.21549200 |
| C | 3.70939200  | 1.36955400  | -0.05156700 |
| C | 5.52878100  | -0.74243400 | -0.19424200 |
| H | 3.82846900  | -2.02154600 | -0.28884100 |
| C | 5.07164100  | 1.63186400  | -0.02937400 |
| H | 3.00318100  | 2.18705500  | 0.00324400  |
| C | 5.98816200  | 0.58536300  | -0.10284800 |
| O | 1.37456300  | -1.41222800 | -0.25466900 |
| O | 7.32506200  | 0.76912800  | -0.10067800 |
| H | 7.53650000  | 1.70637600  | -0.02369700 |
| O | 6.42703800  | -1.76695700 | -0.30339400 |
| H | -8.04094800 | -1.95652100 | 0.10773900  |
| C | 7.05033000  | -2.11622600 | 0.93658500  |
| H | 6.29903200  | -2.47792700 | 1.64339300  |
| H | 7.75948300  | -2.91080000 | 0.71456100  |
| H | 7.57745300  | -1.25803700 | 1.35828200  |
| H | 5.43203900  | 2.65250900  | 0.03856700  |

### 3dC2"O•



$H(\text{UM06-2X}) = -1254.145478 \text{ Ha}$

Charge = 0; Multiplicity = 2

|   |             |             |             |
|---|-------------|-------------|-------------|
| C | 2.88736400  | 1.71210500  | -0.46513900 |
| C | 4.77874500  | 0.22788200  | -0.29226900 |
| C | 4.02215300  | -0.80666100 | 0.24101200  |
| C | 2.58090200  | -0.60812500 | 0.47414900  |
| C | 2.03622300  | 0.69067100  | 0.12950100  |
| H | 6.70247900  | 0.91344900  | -0.93587900 |
| C | 6.14563200  | 0.08445400  | -0.51761000 |
| C | 4.65104100  | -2.01731900 | 0.55447300  |
| C | 6.00710900  | -2.17680800 | 0.33590300  |
| C | 6.75178600  | -1.11998500 | -0.20082800 |
| H | 4.04790000  | -2.81546100 | 0.96945000  |
| H | 6.49284000  | -3.11354900 | 0.57765600  |
| O | 4.22335700  | 1.42669900  | -0.62573000 |
| O | 2.55222400  | 2.80746200  | -0.84909200 |
| O | 1.90896000  | -1.53444300 | 0.95102300  |
| C | 0.66121900  | 0.97915700  | 0.33312500  |
| C | 0.03584100  | 2.30333300  | 0.03697700  |
| H | 0.63581900  | 3.09654900  | 0.47735700  |
| H | 0.03193500  | 2.46990600  | -1.04109800 |
| H | -0.97937400 | 2.34462100  | 0.41940900  |
| N | -0.11323700 | 0.01958000  | 0.82971100  |
| H | 0.32533600  | -0.89496200 | 1.00302600  |
| N | -1.47885800 | 0.13357800  | 0.94301800  |
| C | -2.26502000 | 0.04977200  | -0.18382600 |
| H | -1.86208100 | -0.04350100 | 1.86189700  |
| C | -3.72898200 | 0.09556600  | 0.10858600  |
| C | -4.59987700 | -0.84931900 | -0.56290600 |
| C | -4.25715700 | 1.03541200  | 0.95138100  |
| C | -6.03541300 | -0.71940100 | -0.29171600 |
| C | -5.65846600 | 1.12128400  | 1.17517400  |
| H | -3.60799900 | 1.74920300  | 1.44561000  |
| C | -6.54126000 | 0.25636700  | 0.56060300  |
| O | -1.79562300 | 0.01160800  | -1.29908100 |
| O | -6.82932200 | -1.58561500 | -0.89519600 |
| H | -6.26359000 | -2.17172100 | -1.43140300 |
| H | 7.81448600  | -1.24136200 | -0.37347200 |
| O | -4.23224800 | -1.76564800 | -1.31589900 |
| H | -6.03402000 | 1.88706600  | 1.84158700  |
| H | -7.60889800 | 0.31684500  | 0.72900900  |

**3dC3”O•**

$H(\text{UM06-2X}) = -1254.145955 \text{ Ha}$

Charge = 0; Multiplicity = 2

|   |             |             |             |
|---|-------------|-------------|-------------|
| C | -2.81103800 | 1.76356300  | 0.23654900  |
| C | -4.73093900 | 0.30907300  | 0.31204000  |
| C | -4.01357200 | -0.79722600 | -0.12290500 |
| C | -2.57911700 | -0.65968800 | -0.42839300 |
| C | -1.99887200 | 0.65955200  | -0.25903400 |

|   |             |             |             |
|---|-------------|-------------|-------------|
| H | -6.61784700 | 1.10641400  | 0.93648100  |
| C | -6.09067600 | 0.22243800  | 0.60041800  |
| C | -4.67505200 | -2.02206200 | -0.27027900 |
| C | -6.02467200 | -2.12532900 | 0.01251500  |
| C | -6.72961600 | -0.99711800 | 0.44812300  |
| H | -4.10278100 | -2.87666600 | -0.60986600 |
| H | -6.53490300 | -3.07313900 | -0.10269500 |
| O | -4.14277200 | 1.52704000  | 0.48071100  |
| O | -2.44312100 | 2.89003200  | 0.46976300  |
| O | -1.94036600 | -1.64939800 | -0.81315600 |
| C | -0.62931800 | 0.89242300  | -0.53870900 |
| C | 0.03414700  | 2.22490600  | -0.40985300 |
| H | -0.55572000 | 2.97701400  | -0.92946300 |
| H | 0.05948600  | 2.51668500  | 0.64125600  |
| H | 1.04282900  | 2.19708800  | -0.81041000 |
| N | 0.10836100  | -0.13578700 | -0.95258100 |
| H | -0.35029700 | -1.05570400 | -1.00083400 |
| N | 1.47112000  | -0.06397100 | -1.12190200 |
| C | 2.28111300  | -0.09152300 | -0.02495100 |
| H | 1.80748700  | -0.28509700 | -2.04805500 |
| C | 3.74633000  | -0.12099000 | -0.25870700 |
| C | 4.57627500  | -0.39288800 | 0.84449000  |
| C | 4.32903900  | 0.12682800  | -1.50275500 |
| C | 6.03607400  | -0.48389000 | 0.67600400  |
| C | 5.72515800  | 0.07152000  | -1.69043500 |
| H | 3.71431700  | 0.39679100  | -2.35236600 |
| C | 6.55371300  | -0.23148600 | -0.64708600 |
| O | 1.80393300  | -0.06605100 | 1.10600700  |
| O | 6.76069900  | -0.75642800 | 1.64553500  |
| H | -7.78730900 | -1.07341400 | 0.67002700  |
| O | 4.13152700  | -0.57984100 | 2.06713200  |
| H | 6.13027500  | 0.27409000  | -2.67347200 |
| H | 7.62897700  | -0.28553400 | -0.76915700 |
| H | 3.15606200  | -0.43167600 | 2.05980400  |

### 3dC7"N•

$H(\text{UM06-2X}) = -1254.148333 \text{ Ha}$

Charge = 0; Multiplicity = 2

|   |            |             |             |
|---|------------|-------------|-------------|
| C | 3.26020900 | 1.87996200  | -0.02710500 |
| C | 4.82370300 | 0.05076100  | 0.00589700  |
| C | 3.83019400 | -0.91964000 | -0.00377800 |
| C | 2.41614000 | -0.52232500 | -0.01742200 |
| C | 2.13861300 | 0.92430200  | -0.01061300 |
| H | 6.91777000 | 0.49155000  | 0.03114400  |
| C | 6.17169100 | -0.29277700 | 0.02395100  |
| C | 4.19869700 | -2.27141600 | 0.00350000  |
| C | 5.53314300 | -2.62939300 | 0.02087600  |
| C | 6.51758100 | -1.63416900 | 0.03131000  |
| H | 3.41379400 | -3.01764900 | -0.00443100 |
| H | 5.81783100 | -3.67379700 | 0.02659700  |

|   |             |             |             |
|---|-------------|-------------|-------------|
| O | 4.53338100  | 1.38523600  | -0.00502300 |
| O | 3.16525400  | 3.07896300  | -0.06022000 |
| O | 1.53300200  | -1.37921600 | -0.02909700 |
| C | 0.83886900  | 1.43306800  | 0.00777100  |
| C | 0.47277800  | 2.88136800  | 0.03687800  |
| H | 0.96450800  | 3.36943400  | 0.87751800  |
| H | 0.84123900  | 3.36878900  | -0.86659100 |
| H | -0.60336000 | 2.99471900  | 0.10862200  |
| N | -0.18844200 | 0.53646500  | 0.00017500  |
| H | 0.06267000  | -0.47074900 | -0.01761000 |
| N | -1.44279100 | 0.89704900  | 0.01119700  |
| C | -2.28876900 | -0.21479000 | -0.00123100 |
| C | -3.72196900 | 0.10724700  | 0.00485900  |
| C | -4.64660800 | -0.94731600 | -0.00350100 |
| C | -4.18604600 | 1.43576700  | 0.01758200  |
| C | -6.02219600 | -0.66785400 | 0.00107200  |
| C | -5.54179300 | 1.69573000  | 0.02167500  |
| H | -3.46611800 | 2.24242500  | 0.02407900  |
| C | -6.46214400 | 0.64224100  | 0.01335900  |
| O | -1.85640800 | -1.36889900 | -0.01625800 |
| O | -6.91567600 | -1.68901000 | -0.00663500 |
| H | -6.43264100 | -2.52578500 | -0.01706800 |
| H | 7.56496500  | -1.91115600 | 0.04499400  |
| O | -4.31957900 | -2.25510400 | -0.01583400 |
| H | -3.34519800 | -2.33027900 | -0.02037200 |
| H | -5.89988500 | 2.71699200  | 0.03122100  |
| H | -7.52927900 | 0.83055400  | 0.01634700  |

### 3eC3"O•

$H(\text{UM06-2X}) = -1254.147774 \text{ Ha}$

Charge = 0; Multiplicity = 2

|   |             |             |             |
|---|-------------|-------------|-------------|
| C | -2.94819500 | 1.75506000  | 0.15384500  |
| C | -4.90784800 | 0.35228600  | 0.14142400  |
| C | -4.18349400 | -0.79544300 | -0.15273500 |
| C | -2.72388900 | -0.70824600 | -0.33269800 |
| C | -2.12763400 | 0.60619800  | -0.20187000 |
| H | -6.82125700 | 1.22696200  | 0.54170600  |
| C | -6.28957200 | 0.31218200  | 0.31226500  |
| C | -4.86086700 | -2.01374500 | -0.27867200 |
| C | -6.23231700 | -2.07100500 | -0.11138600 |
| C | -6.94364900 | -0.90217200 | 0.18464700  |
| H | -4.28333600 | -2.90026800 | -0.51030200 |
| H | -6.75494200 | -3.01397700 | -0.20958000 |
| O | -4.30454200 | 1.56615600  | 0.28297900  |
| O | -2.57045800 | 2.88356100  | 0.36226800  |
| O | -2.07967500 | -1.73586000 | -0.58955600 |
| C | -0.73094500 | 0.79169400  | -0.37667500 |
| C | -0.05106700 | 2.12088200  | -0.31581100 |
| H | -0.61248400 | 2.84731500  | -0.89801300 |
| H | -0.04324600 | 2.47624000  | 0.71616400  |

|   |             |             |             |
|---|-------------|-------------|-------------|
| H | 0.96787200  | 2.04688600  | -0.68512100 |
| N | 0.01720400  | -0.27866500 | -0.62257900 |
| H | -0.45749300 | -1.19131500 | -0.63918900 |
| N | 1.39103600  | -0.24185700 | -0.66751000 |
| C | 2.09774800  | -0.12345400 | 0.50565700  |
| H | 1.80731100  | -0.65462900 | -1.49085400 |
| C | 3.58276400  | -0.21840200 | 0.35974300  |
| C | 4.23400300  | 0.13862000  | -0.78977100 |
| C | 4.30762600  | -0.65995400 | 1.50335500  |
| C | 5.66955000  | 0.04648800  | -0.86349100 |
| H | 3.72133100  | 0.52371400  | -1.66368500 |
| C | 5.68186000  | -0.77717600 | 1.48735900  |
| H | 3.74956100  | -0.91001800 | 2.39700200  |
| C | 6.36968400  | -0.43439900 | 0.32785800  |
| O | 1.55343400  | 0.08036700  | 1.56974600  |
| O | 7.68506800  | -0.52320800 | 0.25406100  |
| H | 7.94723300  | -0.23136900 | -0.63821600 |
| O | 6.34707800  | 0.35064900  | -1.86424600 |
| H | -8.01828400 | -0.94233900 | 0.31641700  |
| H | 6.23026200  | -1.12335900 | 2.35400800  |

### 3eC4"O•

$H(\text{UM06-2X}) = -1254.147128 \text{ Ha}$

Charge = 0; Multiplicity = 2

|   |             |             |             |
|---|-------------|-------------|-------------|
| C | -2.93150200 | 1.75605100  | 0.16632000  |
| C | -4.89196500 | 0.35459500  | 0.14311400  |
| C | -4.16932800 | -0.79009300 | -0.16685600 |
| C | -2.71039200 | -0.70150400 | -0.35099600 |
| C | -2.11234700 | 0.61051900  | -0.20378900 |
| H | -6.80346400 | 1.22548000  | 0.56061200  |
| C | -6.27298800 | 0.31313600  | 0.31901000  |
| C | -4.84772000 | -2.00667800 | -0.30347300 |
| C | -6.21848900 | -2.06527800 | -0.13116900 |
| C | -6.92810200 | -0.89947900 | 0.18059300  |
| H | -4.27142200 | -2.89085400 | -0.54685900 |
| H | -6.74183700 | -3.00695800 | -0.23740400 |
| O | -4.28767100 | 1.56664100  | 0.29557700  |
| O | -2.55261600 | 2.88187800  | 0.38648100  |
| O | -2.06774700 | -1.72590800 | -0.62392800 |
| C | -0.71532300 | 0.79569300  | -0.37364400 |
| C | -0.03202100 | 2.12182000  | -0.28914200 |
| H | -0.58944900 | 2.85919100  | -0.86127500 |
| H | -0.02633800 | 2.46021900  | 0.74859200  |
| H | 0.98786000  | 2.05115900  | -0.65648300 |
| N | 0.03083600  | -0.27256300 | -0.63654300 |
| H | -0.44618500 | -1.18383200 | -0.66806300 |
| N | 1.40509500  | -0.23864500 | -0.66895800 |
| C | 2.09885900  | -0.13693200 | 0.51387100  |
| H | 1.82719200  | -0.64495400 | -1.49271800 |
| C | 3.58369400  | -0.23726700 | 0.38871500  |

|   |             |             |             |
|---|-------------|-------------|-------------|
| C | 4.24647400  | 0.13543900  | -0.76959100 |
| C | 4.29069000  | -0.69915200 | 1.53996000  |
| C | 5.63255200  | 0.03228700  | -0.80229800 |
| H | 3.73054500  | 0.53371100  | -1.63492900 |
| C | 5.64503800  | -0.81738000 | 1.52903100  |
| H | 3.71513700  | -0.95846500 | 2.41973900  |
| C | 6.39727700  | -0.45604200 | 0.35167900  |
| O | 1.54347500  | 0.06036600  | 1.57374400  |
| O | 7.63317800  | -0.52051000 | 0.24410600  |
| O | 6.32152100  | 0.38215200  | -1.87296600 |
| H | 7.26393700  | 0.23392500  | -1.67056700 |
| H | -8.00219400 | -0.94066600 | 0.31637100  |
| H | 6.19714100  | -1.17485300 | 2.38936700  |

### 3eC7"N•

$H(\text{UM06-2X}) = -1254.144254 \text{ Ha}$

Charge = 0; Multiplicity = 2

|   |             |             |             |
|---|-------------|-------------|-------------|
| C | -3.17513600 | 1.92133700  | 0.06035800  |
| C | -4.94451600 | 0.29229400  | -0.02242500 |
| C | -4.07330100 | -0.78876300 | -0.00330100 |
| C | -2.62144900 | -0.56078400 | 0.04500900  |
| C | -2.17577200 | 0.84053800  | 0.04027900  |
| H | -6.96996600 | 0.97949100  | -0.08852700 |
| C | -6.32304400 | 0.11158300  | -0.07646700 |
| C | -4.59959000 | -2.08649500 | -0.03911100 |
| C | -5.96637300 | -2.28360800 | -0.09367500 |
| C | -6.82584400 | -1.17868400 | -0.11218100 |
| H | -3.90873600 | -2.92035000 | -0.02454200 |
| H | -6.37195100 | -3.28668200 | -0.12282400 |
| O | -4.49905200 | 1.58201000  | 0.01615300  |
| O | -2.94088500 | 3.10069300  | 0.11815800  |
| O | -1.84869600 | -1.51841500 | 0.07616500  |
| C | -0.82227300 | 1.19084900  | 0.01857100  |
| C | -0.28967600 | 2.58608600  | -0.03301700 |
| H | -0.74177000 | 3.12288500  | -0.86592700 |
| H | -0.57443300 | 3.11983900  | 0.87468000  |
| H | 0.79021700  | 2.57081700  | -0.13173600 |
| N | 0.09176600  | 0.18248900  | 0.03980700  |
| H | -0.27153100 | -0.78898000 | 0.07426200  |
| N | 1.38160900  | 0.38555400  | 0.01826600  |
| C | 2.08053300  | -0.83974100 | 0.05319200  |
| C | 3.54912600  | -0.69033400 | 0.02467000  |
| C | 4.15714600  | 0.57250100  | -0.02993800 |
| C | 4.33585600  | -1.84307700 | 0.05368300  |
| C | 5.53429400  | 0.66439800  | -0.05572500 |
| H | 3.55352100  | 1.47197500  | -0.05189500 |
| C | 5.71877400  | -1.74685900 | 0.02763700  |
| H | 3.85396200  | -2.81140100 | 0.09711000  |
| C | 6.32328700  | -0.49666700 | -0.02740000 |
| O | 1.50674900  | -1.91519500 | 0.10242600  |

|   |             |             |             |
|---|-------------|-------------|-------------|
| O | 7.66916200  | -0.40203200 | -0.05392500 |
| H | 7.91977500  | 0.53070100  | -0.09799400 |
| O | 6.23938500  | 1.82969500  | -0.10813700 |
| H | 5.65249300  | 2.59203300  | -0.14995300 |
| H | -7.89776900 | -1.32931100 | -0.15472100 |
| H | 6.34700500  | -2.62881300 | 0.04789100  |

## Anions

### 3aC2"O<sup>-</sup>

$H(\text{UM06-2X}) = -1179.091182 \text{ Ha}$

Charge = -1; Multiplicity = 1

|   |             |             |             |
|---|-------------|-------------|-------------|
| C | -2.50280800 | 1.74415400  | 0.33439700  |
| C | -4.45712800 | 0.33722500  | 0.22206200  |
| C | -3.73393100 | -0.76657800 | -0.20913200 |
| C | -2.27890400 | -0.64736000 | -0.41680200 |
| C | -1.68856900 | 0.64920800  | -0.16636100 |
| H | -6.36557300 | 1.15022000  | 0.75556200  |
| C | -5.83463400 | 0.26868000  | 0.41876600  |
| C | -4.40777900 | -1.96998300 | -0.44672000 |
| C | -5.77482300 | -2.05556800 | -0.25520700 |
| C | -6.48554600 | -0.93007300 | 0.17806400  |
| H | -3.83025000 | -2.82290500 | -0.78168500 |
| H | -6.29428200 | -2.98731000 | -0.43973000 |
| O | -3.85646400 | 1.53223500  | 0.47936500  |
| O | -2.12855800 | 2.84866600  | 0.65396500  |
| O | -1.63795800 | -1.63945500 | -0.79740100 |
| C | -0.29415500 | 0.86774000  | -0.37124700 |
| C | 0.37436500  | 2.19229100  | -0.19206900 |
| H | -0.20712700 | 2.96805500  | -0.68454900 |
| H | 0.40528000  | 2.44021800  | 0.87003600  |
| H | 1.38507300  | 2.16158900  | -0.58888100 |
| N | 0.45153900  | -0.15448100 | -0.75952800 |
| H | -0.01666600 | -1.06474700 | -0.84865300 |
| N | 1.82235700  | -0.09153400 | -0.86130800 |
| C | 2.59316100  | -0.09290400 | 0.30868700  |
| C | 4.04517600  | -0.15238500 | 0.05221300  |
| C | 4.89617200  | -0.93514500 | 0.92074300  |
| C | 4.57223300  | 0.56599400  | -1.03313200 |
| C | 6.29647200  | -0.88176300 | 0.58460700  |
| C | 5.92797500  | 0.58593300  | -1.31054900 |
| H | 3.89807500  | 1.15296900  | -1.65039400 |
| C | 6.78477900  | -0.15448100 | -0.47744800 |
| O | 2.04245900  | 0.01468400  | 1.38798500  |
| H | -7.55663400 | -0.99228200 | 0.32899200  |
| H | 7.85310500  | -0.15312600 | -0.67298500 |
| H | 6.31614200  | 1.16674500  | -2.13726900 |
| H | 2.19818200  | -0.49794700 | -1.70632100 |
| O | 4.47249600  | -1.64300000 | 1.88121400  |
| H | 6.96924700  | -1.45431700 | 1.21546900  |

**3aC7”N<sup>-</sup>** $H(\text{UM06-2X}) = -1179.102250 \text{ Ha}$ 

Charge = -1; Multiplicity = 1

|   |             |             |             |
|---|-------------|-------------|-------------|
| C | -2.87318700 | 1.90882800  | 0.03530700  |
| C | -4.53036000 | 0.15540600  | 0.00115900  |
| C | -3.56830800 | -0.84500100 | -0.00745600 |
| C | -2.13663500 | -0.48253300 | 0.00046200  |
| C | -1.81948300 | 0.91945800  | 0.00480500  |
| H | -6.61261400 | 0.66095700  | -0.00072500 |
| C | -5.89141600 | -0.14676300 | -0.00844000 |
| C | -3.98101100 | -2.18186700 | -0.02555400 |
| C | -5.32756000 | -2.49989700 | -0.03519400 |
| C | -6.28173400 | -1.47577400 | -0.02655000 |
| H | -3.21873200 | -2.95139600 | -0.03234300 |
| H | -5.64409700 | -3.53541900 | -0.04933300 |
| O | -4.18614700 | 1.47097400  | 0.02211200  |
| O | -2.75687400 | 3.11586300  | 0.07399800  |
| O | -1.28730800 | -1.39251200 | -0.00055500 |
| C | -0.44428100 | 1.36786900  | -0.00879600 |
| C | -0.04989500 | 2.81309200  | -0.04763300 |
| H | -0.53798200 | 3.30837000  | -0.88586800 |
| H | -0.39983700 | 3.31446400  | 0.85527500  |
| H | 1.02880600  | 2.89530700  | -0.12812100 |
| N | 0.51464700  | 0.47513400  | 0.00651700  |
| H | 0.24408200  | -0.51940500 | 0.02316100  |
| N | 1.85397200  | 0.78162500  | -0.00556300 |
| C | 2.58269400  | -0.32096700 | 0.00965700  |
| C | 4.06524000  | -0.12925900 | -0.00176900 |
| C | 4.90660700  | -1.25960300 | 0.01897300  |
| C | 4.64814400  | 1.14249100  | -0.03373500 |
| C | 6.29612500  | -1.09397100 | 0.00820800  |
| C | 6.02467800  | 1.30551800  | -0.04433200 |
| H | 3.99206000  | 2.00420900  | -0.05055500 |
| C | 6.84791600  | 0.17630200  | -0.02287300 |
| O | 2.11681100  | -1.50642900 | 0.03308100  |
| H | -7.33748600 | -1.71980300 | -0.03381900 |
| H | 7.92600600  | 0.29014300  | -0.03090800 |
| H | 6.45637500  | 2.29832300  | -0.06979900 |
| H | 6.92037100  | -1.97984600 | 0.02410200  |
| O | 4.41132900  | -2.51173700 | 0.04952500  |
| H | 3.41503600  | -2.39245500 | 0.04952500  |

**3bC4”O<sup>-</sup>** $H(\text{UM06-2X}) = -1179.098318 \text{ Ha}$ 

Charge = -1; Multiplicity = 1

|   |             |             |             |
|---|-------------|-------------|-------------|
| C | -2.68926700 | 1.76287200  | -0.02156600 |
| C | -4.60306600 | 0.31171700  | 0.19338000  |
| C | -3.85510300 | -0.83592300 | -0.03235600 |
| C | -2.40774700 | -0.72262100 | -0.28977900 |

|   |             |             |             |
|---|-------------|-------------|-------------|
| C | -1.85020600 | 0.61097000  | -0.30438700 |
| H | -6.52482100 | 1.16368600  | 0.60251600  |
| C | -5.97449900 | 0.24737700  | 0.42993600  |
| C | -4.49711900 | -2.07921900 | -0.02025800 |
| C | -5.85777800 | -2.16100400 | 0.21376800  |
| C | -6.59364800 | -0.99163200 | 0.43869200  |
| H | -3.90128800 | -2.96551500 | -0.20088500 |
| H | -6.35354200 | -3.12337900 | 0.22254000  |
| O | -4.03287000 | 1.54886400  | 0.19748100  |
| O | -2.34496300 | 2.91971300  | 0.05439600  |
| O | -1.74501900 | -1.75404000 | -0.48585400 |
| C | -0.45932300 | 0.81742600  | -0.55110400 |
| C | 0.17792200  | 2.16673300  | -0.63053700 |
| H | -0.41091100 | 2.81104500  | -1.27965100 |
| H | 0.17787200  | 2.62478300  | 0.35940800  |
| H | 1.19744900  | 2.08136100  | -0.99504000 |
| N | 0.30785000  | -0.24289800 | -0.73569300 |
| H | -0.14223400 | -1.16340100 | -0.65046400 |
| N | 1.68008400  | -0.16822400 | -0.84882000 |
| C | 2.42104300  | 0.03110900  | 0.33119300  |
| C | 3.86582600  | -0.12918600 | 0.20408100  |
| C | 4.64473300  | -0.13725200 | 1.37918000  |
| C | 4.53929300  | -0.27080700 | -1.02715000 |
| C | 6.00897200  | -0.29713600 | 1.34061000  |
| H | 4.13776500  | -0.02116200 | 2.33152500  |
| C | 5.90448900  | -0.42631100 | -1.08455700 |
| H | 3.99229100  | -0.22771700 | -1.96415100 |
| C | 6.72499100  | -0.45701600 | 0.09995900  |
| O | 1.83551000  | 0.36001200  | 1.35192800  |
| O | 7.97975500  | -0.60759000 | 0.05237600  |
| H | -7.65983400 | -1.05095800 | 0.62186200  |
| H | 6.58664900  | -0.30807300 | 2.25929800  |
| H | 6.40304300  | -0.52132000 | -2.04354700 |
| H | 2.04562300  | -0.79775000 | -1.54905900 |

### 3bC7<sup>+</sup>N<sup>-</sup>

$H(\text{UM06-2X}) = -1179.109574 \text{ Ha}$

Charge = -1; Multiplicity = 1

|   |             |             |             |
|---|-------------|-------------|-------------|
| C | -2.97433400 | 1.87433800  | 0.14005700  |
| C | -4.71009800 | 0.20803800  | 0.00249900  |
| C | -3.79538900 | -0.83627800 | -0.01725000 |
| C | -2.34719400 | -0.54155200 | 0.02645300  |
| C | -1.97120400 | 0.84340100  | 0.02446600  |
| H | -6.76485500 | 0.81317400  | -0.03555400 |
| C | -6.08296500 | -0.02787900 | -0.05428000 |
| C | -4.27111100 | -2.14994900 | -0.09287100 |
| C | -5.63059100 | -2.40247700 | -0.15045700 |
| C | -6.53555900 | -1.33489700 | -0.13109200 |
| H | -3.54610700 | -2.95463900 | -0.10768300 |
| H | -5.99488000 | -3.42037600 | -0.21097200 |



|   |             |             |             |
|---|-------------|-------------|-------------|
| O | -4.30727800 | 1.50392900  | 0.08995200  |
| O | -2.79645100 | 3.06590500  | 0.29229200  |
| O | -1.53941600 | -1.48873500 | 0.04424800  |
| C | -0.57873900 | 1.23734300  | -0.04436000 |
| C | -0.13452700 | 2.65147700  | -0.27010800 |
| H | -0.79877300 | 3.14839900  | -0.97236400 |
| H | -0.18224100 | 3.21134800  | 0.66651600  |
| H | 0.88926700  | 2.65155900  | -0.63274200 |
| N | 0.35052600  | 0.32222600  | 0.05459500  |
| H | 0.05663500  | -0.65966500 | 0.15790400  |
| N | 1.69656300  | 0.57740400  | -0.00534600 |
| C | 2.38244700  | -0.56610600 | 0.08648700  |
| C | 3.87458200  | -0.39849100 | 0.03617700  |
| C | 4.68426900  | -1.52992400 | 0.12248700  |
| C | 4.48654700  | 0.85257700  | -0.09714600 |
| C | 6.07029800  | -1.42735100 | 0.07873200  |
| H | 4.21388000  | -2.50040400 | 0.22497100  |
| C | 5.86715000  | 0.96989700  | -0.14130600 |
| H | 3.86690000  | 1.73781100  | -0.16612600 |
| C | 6.66217900  | -0.17333500 | -0.05304300 |
| O | 1.88850200  | -1.71061400 | 0.20702700  |
| O | 8.01272900  | -0.00258900 | -0.10229300 |
| H | 8.45611300  | -0.85482700 | -0.03452000 |
| H | -7.60088900 | -1.52730200 | -0.17571500 |
| H | 6.69071200  | -2.31543500 | 0.14417900  |
| H | 6.34535500  | 1.93677700  | -0.24510600 |

### 3cC4"O<sup>-</sup>

$H(\text{UM06-2X}) = -1293.572976 \text{ Ha}$

Charge = -1; Multiplicity = 1

|   |             |             |             |
|---|-------------|-------------|-------------|
| C | -3.26026100 | 1.73986300  | -0.29550400 |
| C | -5.19990800 | 0.42060800  | 0.25990300  |
| C | -4.49539000 | -0.77502000 | 0.21987600  |
| C | -3.06117700 | -0.76241700 | -0.12300600 |
| C | -2.47277000 | 0.52484100  | -0.41776400 |
| H | -7.07569500 | 1.40235300  | 0.58511600  |
| C | -6.55945100 | 0.45088800  | 0.56284800  |
| C | -5.16989200 | -1.97026700 | 0.49513200  |
| C | -6.51900700 | -1.95781100 | 0.79936400  |
| C | -7.21114700 | -0.74150600 | 0.83116000  |
| H | -4.60743900 | -2.89518400 | 0.46073100  |
| H | -7.03912400 | -2.88326500 | 1.01159900  |
| O | -4.59762400 | 1.61662900  | 0.01356100  |
| O | -2.87633300 | 2.87871300  | -0.42948300 |
| O | -2.43554200 | -1.83438800 | -0.15361100 |
| C | -1.09970000 | 0.63062200  | -0.79363800 |
| C | -0.44128700 | 1.91519000  | -1.17956700 |
| H | -1.07573300 | 2.46037700  | -1.87414900 |
| H | -0.32363800 | 2.53935500  | -0.29250900 |
| H | 0.53267100  | 1.72146300  | -1.61980800 |

|   |             |             |             |
|---|-------------|-------------|-------------|
| N | -0.37185500 | -0.47250500 | -0.82174000 |
| H | -0.83393700 | -1.34281600 | -0.52675900 |
| N | 0.98696500  | -0.47122000 | -1.05412800 |
| C | 1.82674900  | -0.04781700 | -0.00908400 |
| C | 3.25509900  | -0.26899300 | -0.21660900 |
| C | 4.12752500  | -0.01653400 | 0.86253500  |
| C | 3.82130400  | -0.70493300 | -1.42824900 |
| C | 5.47997700  | -0.21411700 | 0.75435000  |
| H | 3.72222100  | 0.33153000  | 1.80687500  |
| C | 5.17992100  | -0.90098400 | -1.55102400 |
| H | 3.20142000  | -0.87085000 | -2.30385000 |
| C | 6.09834900  | -0.68918100 | -0.46735300 |
| O | 1.33549700  | 0.50739600  | 0.96168800  |
| O | 7.34042200  | -0.89763900 | -0.55984800 |
| O | 6.27872600  | 0.00151000  | 1.85909700  |
| H | -8.26822700 | -0.72749500 | 1.06863600  |
| C | 7.08884400  | 1.16658100  | 1.73768700  |
| H | 7.69585500  | 1.11935800  | 0.83154000  |
| H | 6.45954900  | 2.06238100  | 1.71832600  |
| H | 7.73645700  | 1.19790400  | 2.61327600  |
| H | 5.59872700  | -1.23569000 | -2.49433500 |
| H | 1.28329200  | -1.24520500 | -1.63120500 |

### 3cC7"N<sup>-</sup>

$H(\text{UM06-2X}) = -1293.588914 \text{ Ha}$

Charge = -1; Multiplicity = 1

|   |             |             |             |
|---|-------------|-------------|-------------|
| C | 3.70572500  | 1.80785500  | -0.20144500 |
| C | 5.29036500  | 0.00023000  | -0.02549200 |
| C | 4.28824500  | -0.95854100 | 0.04461600  |
| C | 2.87127300  | -0.53831900 | 0.01164500  |
| C | 2.61857800  | 0.87385200  | -0.03486500 |
| H | 7.39067000  | 0.42256200  | -0.04742200 |
| C | 6.63808200  | -0.35382600 | 0.01362000  |
| C | 4.64884600  | -2.30612200 | 0.15379900  |
| C | 5.98190100  | -2.67551800 | 0.19385700  |
| C | 6.97616400  | -1.69271100 | 0.12319300  |
| H | 3.85682200  | -3.04318900 | 0.20759900  |
| H | 6.25663800  | -3.71942100 | 0.27938400  |
| O | 5.00140300  | 1.32311100  | -0.15020700 |
| O | 3.63163600  | 3.00383400  | -0.39820300 |
| O | 1.98195600  | -1.40899500 | 0.04250500  |
| C | 1.26843800  | 1.39302600  | 0.03476600  |
| C | 0.95736500  | 2.84683500  | 0.22899200  |
| H | 1.67646100  | 3.29913000  | 0.90679600  |
| H | 1.03580000  | 3.37649300  | -0.72297300 |
| H | -0.05490400 | 2.94793900  | 0.60919700  |
| N | 0.25760500  | 0.56550600  | -0.03453900 |
| H | 0.45723200  | -0.44170100 | -0.11126500 |
| N | -1.05709600 | 0.95041900  | 0.02391300  |
| C | -1.85221200 | -0.12144500 | -0.03238300 |

|   |             |             |             |
|---|-------------|-------------|-------------|
| C | -3.32163000 | 0.19477900  | 0.01801600  |
| C | -4.22409700 | -0.87204800 | -0.07085800 |
| C | -3.80583000 | 1.49374800  | 0.15116000  |
| C | -5.58807000 | -0.63335400 | -0.02848800 |
| H | -3.82719000 | -1.87342300 | -0.17187500 |
| C | -5.17697100 | 1.73501100  | 0.19393300  |
| H | -3.10695100 | 2.31671000  | 0.22235800  |
| C | -6.06917000 | 0.67901600  | 0.10434700  |
| O | -1.47547900 | -1.31272400 | -0.12288900 |
| O | -7.40787400 | 0.90875100  | 0.14522800  |
| H | -7.86142300 | 0.05850200  | 0.07069400  |
| O | -6.56871200 | -1.57794300 | -0.10379200 |
| H | 8.02144100  | -1.97705300 | 0.15274200  |
| C | -6.16465300 | -2.93357700 | -0.23248700 |
| H | -5.59324400 | -3.07987300 | -1.15247500 |
| H | -5.56439300 | -3.24009200 | 0.62768300  |
| H | -7.07921400 | -3.51973400 | -0.27009000 |
| H | -5.56883700 | 2.74006800  | 0.29734600  |

### 3dC2"O<sup>-</sup>

$H(\text{UM06-2X}) = -1254.321318 \text{ Ha}$

Charge = -1; Multiplicity = 1

|   |             |             |             |
|---|-------------|-------------|-------------|
| C | -2.77820600 | 1.73584900  | -0.38532900 |
| C | -4.75283000 | 0.45544000  | 0.13703400  |
| C | -4.06888000 | -0.75231500 | 0.13183500  |
| C | -2.62516600 | -0.77012100 | -0.17060500 |
| C | -1.99771700 | 0.50859200  | -0.43693200 |
| H | -6.61724100 | 1.47534800  | 0.40418100  |
| C | -6.11769700 | 0.51479500  | 0.40971500  |
| C | -4.77054200 | -1.93112300 | 0.41066800  |
| C | -6.12531100 | -1.88989500 | 0.68596200  |
| C | -6.79604800 | -0.66130900 | 0.68343000  |
| H | -4.22385000 | -2.86601300 | 0.40366700  |
| H | -6.66600100 | -2.80233000 | 0.90306100  |
| O | -4.12593100 | 1.63646500  | -0.11982900 |
| O | -2.37904500 | 2.86482600  | -0.54934800 |
| O | -2.02352800 | -1.85405200 | -0.18533300 |
| C | -0.60483700 | 0.59469100  | -0.71815000 |
| C | 0.10180200  | 1.87742900  | -1.01505300 |
| H | 0.08013900  | 2.51658000  | -0.13211300 |
| H | 1.13001900  | 1.68917600  | -1.30727800 |
| H | -0.42767800 | 2.40848300  | -1.80396600 |
| N | 0.10525700  | -0.52672600 | -0.73748600 |
| H | -0.38856600 | -1.39573100 | -0.50486000 |
| N | 1.47593500  | -0.54970600 | -0.83104300 |
| C | 2.25697100  | -0.16953700 | 0.25332700  |
| H | 1.86684700  | -0.99036200 | -1.65037800 |
| C | 3.69232700  | -0.47497800 | 0.09398100  |
| C | 4.66491100  | 0.46224300  | 0.54299800  |

|   |             |             |             |
|---|-------------|-------------|-------------|
| C | 4.08414500  | -1.70011000 | -0.49623600 |
| C | 6.04151500  | 0.06494700  | 0.33776100  |
| C | 5.41119800  | -2.03545400 | -0.64935800 |
| H | 3.32124300  | -2.41157900 | -0.79580700 |
| C | 6.40726900  | -1.12804800 | -0.22673400 |
| O | 1.73259100  | 0.38185900  | 1.20485900  |
| O | 6.95731400  | 0.98233900  | 0.75570500  |
| H | 6.39975000  | 1.71031700  | 1.09315700  |
| H | -7.85735100 | -0.62493600 | 0.89828300  |
| O | 4.46658400  | 1.60963800  | 1.06457900  |
| H | 5.69255700  | -2.98791100 | -1.08024700 |
| H | 7.46050400  | -1.36119000 | -0.34294900 |

### 3dC3"O<sup>-</sup>

$H(\text{UM06-2X}) = -1254.318248 \text{ Ha}$

Charge = -1; Multiplicity = 1

|   |             |             |             |
|---|-------------|-------------|-------------|
| C | -2.85293100 | 1.70099200  | 0.48958600  |
| C | -4.75242700 | 0.22644400  | 0.31486100  |
| C | -4.00646200 | -0.79691100 | -0.25363400 |
| C | -2.56754600 | -0.59605800 | -0.50347500 |
| C | -2.01489300 | 0.69115400  | -0.13797200 |
| H | -6.66437500 | 0.90014000  | 1.00495800  |
| C | -6.11619900 | 0.08016500  | 0.55825100  |
| C | -4.64289900 | -1.99867600 | -0.58499000 |
| C | -5.99590800 | -2.16089900 | -0.34919200 |
| C | -6.72997000 | -1.11557800 | 0.22363100  |
| H | -4.04806100 | -2.78804700 | -1.02794700 |
| H | -6.48732400 | -3.09090300 | -0.60518100 |
| O | -4.18853800 | 1.41549200  | 0.66636200  |
| O | -2.51108500 | 2.78856300  | 0.89140300  |
| O | -1.90672200 | -1.51485900 | -1.01149400 |
| C | -0.63679300 | 0.97879300  | -0.35150200 |
| C | -0.00599100 | 2.29817300  | -0.04467700 |
| H | -0.61083100 | 3.09792200  | -0.46637100 |
| H | 0.01268800  | 2.44910700  | 1.03539200  |
| H | 1.00521400  | 2.33876500  | -0.43883900 |
| N | 0.12965600  | 0.02762300  | -0.86657800 |
| H | -0.31347900 | -0.88204400 | -1.04966400 |
| N | 1.49483500  | 0.14140700  | -0.98407700 |
| C | 2.28807300  | 0.05368700  | 0.15168700  |
| H | 1.87330600  | -0.09198300 | -1.89145000 |
| C | 3.74242500  | 0.06305800  | -0.14463400 |
| C | 4.61568400  | -0.67953000 | 0.63297500  |
| C | 4.25135600  | 0.83635000  | -1.21621600 |
| C | 6.03512800  | -0.71268300 | 0.38180000  |
| C | 5.61227100  | 0.83980000  | -1.46321400 |
| H | 3.58389800  | 1.45357300  | -1.80509000 |
| C | 6.49445100  | 0.07911600  | -0.68573600 |
| O | 1.78567900  | 0.03067400  | 1.25720800  |
| O | 6.74309300  | -1.46334000 | 1.15223100  |

H            -7.79008400   -1.23909400   0.41014400

### 3dC7"N<sup>-</sup>

$H(\text{UM06-2X}) = -1254.343943 \text{ Ha}$

Charge = -1; Multiplicity = 1

|   |             |             |             |
|---|-------------|-------------|-------------|
| C | 3.26642000  | 1.86452800  | -0.05136100 |
| C | 4.84428800  | 0.04017400  | -0.00357300 |
| C | 3.84036100  | -0.91808200 | 0.01094500  |
| C | 2.42562600  | -0.49306300 | 0.00004900  |
| C | 2.17047200  | 0.92241600  | -0.00779700 |
| H | 6.94568700  | 0.45815700  | -0.00438000 |
| C | 6.19121600  | -0.31858500 | 0.00880400  |
| C | 4.19652400  | -2.27134100 | 0.03782400  |
| C | 5.52853600  | -2.64547000 | 0.05038000  |
| C | 6.52521600  | -1.66261700 | 0.03568800  |
| H | 3.40241600  | -3.00799700 | 0.04898300  |
| H | 5.80086700  | -3.69339400 | 0.07129000  |
| O | 4.55798400  | 1.36903400  | -0.03461200 |
| O | 3.20309300  | 3.07471300  | -0.10531600 |
| O | 1.53685900  | -1.36414800 | 0.00326300  |
| C | 0.81827000  | 1.43255800  | 0.01173000  |
| C | 0.49005700  | 2.89390200  | 0.06548000  |
| H | 1.01364100  | 3.36133600  | 0.89816900  |
| H | 0.84697800  | 3.38527100  | -0.84022800 |
| H | -0.58222800 | 3.02395700  | 0.16500400  |
| N | -0.18130900 | 0.58475000  | -0.00799500 |
| H | 0.04208100  | -0.42115200 | -0.03061400 |
| N | -1.50416600 | 0.95684900  | 0.01017200  |
| C | -2.28751800 | -0.10435000 | -0.01047900 |
| C | -3.75766200 | 0.16199100  | 0.00637500  |
| C | -4.62673500 | -0.93405000 | -0.01885100 |
| C | -4.29709700 | 1.45581700  | 0.04765300  |
| C | -6.01631400 | -0.73209000 | -0.00341500 |
| C | -5.66850700 | 1.64606900  | 0.06261000  |
| H | -3.61939500 | 2.29944700  | 0.06795300  |
| C | -6.53529400 | 0.54804600  | 0.03676500  |
| O | -1.88676700 | -1.31517100 | -0.04326200 |
| O | -6.84218200 | -1.81488400 | -0.02838700 |
| H | -6.28965300 | -2.60768300 | -0.05729500 |
| H | 7.56970000  | -1.95124100 | 0.04495500  |
| O | -4.20558200 | -2.21679800 | -0.05843300 |
| H | -3.19723500 | -2.14201500 | -0.06096400 |
| H | -6.07788300 | 2.64816300  | 0.09502700  |
| H | -7.61103900 | 0.67887700  | 0.04786600  |

### 3eC3"O<sup>-</sup>

$H(\text{UM06-2X}) = -1254.323002 \text{ Ha}$

Charge = -1; Multiplicity = 1

|   |             |            |            |
|---|-------------|------------|------------|
| C | -2.97352200 | 1.76093700 | 0.07000800 |
| C | -4.89989600 | 0.31217200 | 0.12741100 |

|   |             |             |             |
|---|-------------|-------------|-------------|
| C | -4.14981500 | -0.82622500 | -0.13559400 |
| C | -2.69404700 | -0.70835400 | -0.33499600 |
| C | -2.12830500 | 0.62067600  | -0.24600400 |
| H | -6.82992800 | 1.15228400  | 0.52171200  |
| C | -6.27824800 | 0.24342400  | 0.31705100  |
| C | -4.79733500 | -2.06478700 | -0.20984100 |
| C | -6.16480800 | -2.15089600 | -0.02242200 |
| C | -6.90251100 | -0.99077400 | 0.24147800  |
| H | -4.20012000 | -2.94404300 | -0.41819700 |
| H | -6.66427500 | -3.10969200 | -0.08049500 |
| O | -4.32567100 | 1.54413600  | 0.21783100  |
| O | -2.62618400 | 2.90777500  | 0.22908600  |
| O | -2.02938100 | -1.72936500 | -0.56966600 |
| C | -0.72989100 | 0.83067200  | -0.41919200 |
| C | -0.08135200 | 2.17649400  | -0.38715500 |
| H | -0.64006200 | 2.86569800  | -1.01619000 |
| H | -0.11662400 | 2.57167900  | 0.62911100  |
| H | 0.95067000  | 2.10842200  | -0.71882700 |
| N | 0.04110500  | -0.22448800 | -0.63616400 |
| H | -0.41547900 | -1.14584000 | -0.63118400 |
| N | 1.41548300  | -0.15779400 | -0.65940900 |
| C | 2.09914900  | -0.00657500 | 0.54103700  |
| H | 1.84812800  | -0.65023100 | -1.42816000 |
| C | 3.57273000  | -0.13323100 | 0.43899600  |
| C | 4.25184100  | 0.06098300  | -0.77887000 |
| C | 4.26134900  | -0.47110100 | 1.59986800  |
| C | 5.64787800  | -0.08815100 | -0.86767800 |
| H | 3.72498600  | 0.37591100  | -1.67370700 |
| C | 5.65083100  | -0.63746300 | 1.54899600  |
| H | 3.71866200  | -0.61648200 | 2.52485000  |
| C | 6.31416600  | -0.45258200 | 0.35493500  |
| O | 1.49149200  | 0.24031000  | 1.56652500  |
| O | 7.66010300  | -0.59296500 | 0.24713400  |
| H | 7.82447400  | -0.39040400 | -0.69550300 |
| O | 6.37657400  | 0.07652500  | -1.91555000 |
| H | -7.97405100 | -1.05359800 | 0.38892400  |
| H | 6.21276700  | -0.91037400 | 2.43563900  |

**3eC4"O<sup>-</sup>**

$H(\text{UM06-2X}) = -1254.326808 \text{ Ha}$

Charge = -1; Multiplicity = 1

|   |             |             |             |
|---|-------------|-------------|-------------|
| C | -2.98872200 | 1.76748700  | -0.03396400 |
| C | -4.88932600 | 0.29364700  | 0.14319100  |
| C | -4.12777700 | -0.84345000 | -0.08975900 |
| C | -2.67901400 | -0.71232400 | -0.32942700 |
| C | -2.13171000 | 0.62604200  | -0.30775300 |
| H | -6.82230200 | 1.12085900  | 0.55006200  |
| C | -6.26137300 | 0.21236500  | 0.37041600  |
| C | -4.75680800 | -2.09351300 | -0.09589000 |
| C | -6.11791100 | -2.19211400 | 0.12867600  |

|   |             |             |             |
|---|-------------|-------------|-------------|
| C | -6.86741400 | -1.03310500 | 0.36216000  |
| H | -4.15040200 | -2.97148500 | -0.28200700 |
| H | -6.60338400 | -3.15974500 | 0.12368500  |
| O | -4.33287500 | 1.53677000  | 0.16304100  |
| O | -2.65991000 | 2.92808700  | 0.05032800  |
| O | -2.00485200 | -1.73373400 | -0.53730400 |
| C | -0.73543500 | 0.84589800  | -0.50324000 |
| C | -0.10273600 | 2.19962100  | -0.51745700 |
| H | -0.65587400 | 2.85241700  | -1.18937200 |
| H | -0.16687400 | 2.63991200  | 0.47837000  |
| H | 0.93694600  | 2.12859500  | -0.82267900 |
| N | 0.04386900  | -0.20545000 | -0.69473700 |
| H | -0.40431000 | -1.13020400 | -0.65078000 |
| N | 1.41948500  | -0.12242800 | -0.72827200 |
| C | 2.09192400  | 0.04593100  | 0.49258600  |
| H | 1.83344800  | -0.71247600 | -1.43603900 |
| C | 3.54760000  | -0.09189300 | 0.43110600  |
| C | 4.27441900  | -0.11987700 | -0.78609400 |
| C | 4.24851300  | -0.20922500 | 1.63592900  |
| C | 5.63400900  | -0.27408900 | -0.75965200 |
| H | 3.79213000  | 0.01652100  | -1.74850700 |
| C | 5.62511100  | -0.36844600 | 1.66276500  |
| H | 3.68678100  | -0.18582400 | 2.56298900  |
| C | 6.38690000  | -0.40897000 | 0.46597100  |
| O | 1.45252300  | 0.32851500  | 1.49365200  |
| O | 7.65095600  | -0.54373900 | 0.37784900  |
| O | 6.38167200  | -0.29038500 | -1.89971200 |
| H | 7.29297700  | -0.39931400 | -1.57070100 |
| H | -7.93390400 | -1.10584000 | 0.53870400  |
| H | 6.14968200  | -0.46630500 | 2.60713500  |

**3eC7”N<sup>-</sup>**

*H*(UM06-2X)= -1254.331798 Ha

Charge = -1; Multiplicity =1

|   |             |             |             |
|---|-------------|-------------|-------------|
| C | -3.17724100 | 1.88690700  | 0.17895800  |
| C | -4.98162300 | 0.30011600  | -0.00168400 |
| C | -4.11355100 | -0.78319900 | -0.03256900 |
| C | -2.65404500 | -0.55194000 | 0.02679000  |
| C | -2.21959100 | 0.81594300  | 0.04498300  |
| H | -7.00651500 | 0.99754300  | -0.04899200 |
| C | -6.36278100 | 0.12706200  | -0.07603300 |
| C | -4.64684200 | -2.07291400 | -0.13663600 |
| C | -6.01557300 | -2.26317800 | -0.21153400 |
| C | -6.87247900 | -1.15668400 | -0.18141400 |
| H | -3.95848800 | -2.90898900 | -0.15942800 |
| H | -6.42406900 | -3.26258200 | -0.29458300 |
| O | -4.52418300 | 1.57509000  | 0.11586800  |
| O | -2.94835500 | 3.06579900  | 0.35904400  |
| O | -1.88715200 | -1.53221900 | 0.03670600  |
| C | -0.81265800 | 1.15196400  | -0.02100300 |

|   |             |             |             |
|---|-------------|-------------|-------------|
| C | -0.30960700 | 2.54588600  | -0.24925000 |
| H | -0.96973700 | 3.08117100  | -0.92633000 |
| H | -0.29938100 | 3.09829100  | 0.69314200  |
| H | 0.70196200  | 2.49986700  | -0.64277200 |
| N | 0.07837900  | 0.19968700  | 0.07945600  |
| H | -0.25418300 | -0.76951300 | 0.18128800  |
| N | 1.43298900  | 0.40183800  | 0.02037800  |
| C | 2.07479700  | -0.76673600 | 0.11212600  |
| C | 3.57304500  | -0.65269700 | 0.06297300  |
| C | 4.21195700  | 0.58557300  | -0.07313200 |
| C | 4.34399100  | -1.80829900 | 0.15477900  |
| C | 5.59209900  | 0.65253300  | -0.11423600 |
| H | 3.62109300  | 1.49161900  | -0.14593800 |
| C | 5.73449600  | -1.74128500 | 0.11228900  |
| H | 3.84387500  | -2.76253400 | 0.25988700  |
| C | 6.36369400  | -0.51367600 | -0.02212200 |
| O | 1.53991700  | -1.89226000 | 0.23183700  |
| O | 7.72075200  | -0.44176800 | -0.06506900 |
| H | 7.97836700  | 0.48366000  | -0.16427400 |
| O | 6.31087200  | 1.80959800  | -0.24295300 |
| H | 5.72495600  | 2.57010400  | -0.31474600 |
| H | -7.94478200 | -1.30080400 | -0.23986000 |
| H | 6.34401100  | -2.63469300 | 0.18057600  |

## Radical cations

### 3a<sup>•+</sup>

$H(\text{UM06-2X}) = -1179.307568 \text{ Ha}$

Charge = 1; Multiplicity = 2

|   |             |             |             |
|---|-------------|-------------|-------------|
| C | -2.44165300 | 1.69982000  | -0.32111500 |
| C | -4.45527600 | 0.45341900  | 0.01705700  |
| C | -3.79698600 | -0.76212500 | 0.19215000  |
| C | -2.34746600 | -0.83289300 | 0.08122000  |
| C | -1.66357900 | 0.43420500  | -0.29944500 |
| H | -6.31480300 | 1.50463800  | -0.04349000 |
| C | -5.83750000 | 0.54339200  | 0.09561900  |
| C | -4.55083400 | -1.91650300 | 0.45823200  |
| C | -5.92539400 | -1.84042600 | 0.54110100  |
| C | -6.56439600 | -0.60755600 | 0.35674200  |
| H | -4.02755100 | -2.85497900 | 0.59222600  |
| H | -6.50872500 | -2.72809600 | 0.74729800  |
| O | -3.78458500 | 1.62570000  | -0.21820000 |
| O | -1.93579100 | 2.78330400  | -0.40370300 |
| O | -1.72575000 | -1.87812300 | 0.24441500  |
| C | -0.27597600 | 0.48400600  | -0.64203100 |
| C | 0.41047900  | 1.65301600  | -1.26006800 |
| H | -0.25248000 | 2.11444500  | -1.98852700 |
| H | 0.65927400  | 2.39595800  | -0.50188400 |
| H | 1.32358000  | 1.32100100  | -1.75247300 |
| N | 0.37944300  | -0.65114800 | -0.44536000 |



|   |             |             |             |
|---|-------------|-------------|-------------|
| H | -0.20010200 | -1.47552300 | -0.14713900 |
| N | 1.70533700  | -0.80039300 | -0.57993200 |
| C | 2.58194500  | 0.04460800  | 0.16075800  |
| H | 1.97881100  | -1.77052700 | -0.70257900 |
| C | 4.00651000  | -0.23668900 | -0.00534300 |
| C | 4.91388400  | 0.32844300  | 0.91768300  |
| C | 4.49506900  | -1.04205900 | -1.05045300 |
| C | 6.27610600  | 0.03733000  | 0.80103300  |
| C | 5.84249700  | -1.30892000 | -1.16467000 |
| H | 3.81450100  | -1.43291900 | -1.79766100 |
| C | 6.72948600  | -0.77065900 | -0.22347200 |
| O | 2.10725600  | 0.90757700  | 0.86796000  |
| H | -7.64402100 | -0.54655600 | 0.42027700  |
| H | 7.78956000  | -0.98025200 | -0.30295500 |
| H | 6.20889000  | -1.92215100 | -1.97687200 |
| H | 6.95596300  | 0.46818800  | 1.52537300  |
| O | 4.54465200  | 1.13337900  | 1.92418700  |
| H | 3.59589600  | 1.33041600  | 1.85819800  |

### 3b<sup>+</sup>

$H(\text{UM06-2X}) = -1179.308416 \text{ Ha}$

Charge = 1; Multiplicity = 2

|   |             |             |             |
|---|-------------|-------------|-------------|
| C | -2.65242600 | 1.73999700  | -0.15170200 |
| C | -4.62856200 | 0.39845800  | 0.04040300  |
| C | -3.93141000 | -0.80660600 | 0.08806900  |
| C | -2.47949400 | -0.81311200 | -0.01718600 |
| C | -1.82889500 | 0.50695300  | -0.21646100 |
| H | -6.52380900 | 1.38653400  | 0.08212000  |
| C | -6.01401400 | 0.43271600  | 0.12110200  |
| C | -4.64650900 | -2.00722800 | 0.22155400  |
| C | -6.02329300 | -1.98671600 | 0.30410100  |
| C | -6.70248100 | -0.76283200 | 0.25216600  |
| H | -4.09141300 | -2.93633700 | 0.25580400  |
| H | -6.57702100 | -2.91052300 | 0.40748500  |
| O | -3.99703000 | 1.60784100  | -0.07355200 |
| O | -2.19859800 | 2.84943700  | -0.14459300 |
| O | -1.83382800 | -1.86091100 | 0.00970300  |
| C | -0.45159200 | 0.63317100  | -0.47526600 |
| C | 0.24705500  | 1.88254000  | -0.89548000 |
| H | -0.38084600 | 2.42100300  | -1.60144500 |
| H | 0.42943500  | 2.53113900  | -0.03871300 |
| H | 1.19561300  | 1.63444800  | -1.36976500 |
| N | 0.23112700  | -0.52660500 | -0.41545300 |
| H | -0.37159300 | -1.39364700 | -0.29616500 |
| N | 1.54829900  | -0.63935800 | -0.45259100 |
| C | 2.39014100  | 0.16814600  | 0.41437200  |
| H | 1.85926400  | -1.58643700 | -0.65347500 |
| C | 3.82306100  | -0.06236200 | 0.22609100  |
| C | 4.68035500  | 0.34861600  | 1.25369100  |
| C | 4.35452300  | -0.64185900 | -0.93384200 |

|   |             |             |             |
|---|-------------|-------------|-------------|
| C | 6.04448400  | 0.17068300  | 1.13709800  |
| H | 4.26231700  | 0.79962300  | 2.14533400  |
| C | 5.71873100  | -0.81384800 | -1.06039000 |
| H | 3.71440200  | -0.93288600 | -1.75880200 |
| C | 6.56639600  | -0.41363000 | -0.02275900 |
| O | 1.86599700  | 0.90904800  | 1.19808900  |
| O | 7.88494700  | -0.61456100 | -0.19865000 |
| H | 8.38497000  | -0.30310900 | 0.56471400  |
| H | -7.78360900 | -0.74457600 | 0.31618200  |
| H | 6.70971600  | 0.47984400  | 1.93528300  |
| H | 6.14826300  | -1.24867800 | -1.95359600 |

**3c<sup>+</sup>**

$H(\text{UM06-2X}) = -1293.788147 \text{ Ha}$

Charge = 1; Multiplicity = 2

|   |             |             |             |
|---|-------------|-------------|-------------|
| C | -3.18066400 | 1.65402900  | -0.57205200 |
| C | -5.18171200 | 0.49009400  | 0.04635300  |
| C | -4.51810500 | -0.69160600 | 0.36832200  |
| C | -3.07454500 | -0.78519600 | 0.20396500  |
| C | -2.40006800 | 0.40935400  | -0.36345200 |
| H | -7.04299400 | 1.53440500  | -0.07970400 |
| C | -6.55940400 | 0.60081100  | 0.17636100  |
| C | -5.25960100 | -1.78939900 | 0.83254000  |
| C | -6.62900700 | -1.69219700 | 0.96638100  |
| C | -7.27433000 | -0.49375000 | 0.63595900  |
| H | -4.73063300 | -2.70212800 | 1.07663100  |
| H | -7.20372100 | -2.53702600 | 1.32244600  |
| O | -4.52200400 | 1.60463300  | -0.39755700 |
| O | -2.69432800 | 2.70900900  | -0.86764800 |
| O | -2.45855300 | -1.81648600 | 0.47389200  |
| C | -1.04169400 | 0.40118500  | -0.72639600 |
| C | -0.33848500 | 1.46730600  | -1.49752000 |
| H | -0.99966800 | 1.83418500  | -2.27922600 |
| H | -0.07924600 | 2.30581000  | -0.85119800 |
| H | 0.56764200  | 1.06362700  | -1.94739000 |
| N | -0.39099400 | -0.73687200 | -0.41152500 |
| H | -1.01016500 | -1.51374100 | -0.03364300 |
| N | 0.91505100  | -0.91902900 | -0.50160700 |
| C | 1.84381600  | 0.04561300  | 0.06162300  |
| H | 1.18573400  | -1.89909700 | -0.47475900 |
| C | 3.24977500  | -0.28819200 | -0.16861600 |
| C | 4.19286800  | 0.35145100  | 0.65467200  |
| C | 3.65616200  | -1.16556300 | -1.17336900 |
| C | 5.53350100  | 0.09071000  | 0.47152200  |
| H | 3.84748000  | 1.03147100  | 1.42199900  |
| C | 5.00826100  | -1.41751700 | -1.36218300 |
| H | 2.93874600  | -1.63040000 | -1.83856500 |
| C | 5.94501100  | -0.80158900 | -0.54578200 |
| O | 1.40445900  | 0.98440600  | 0.66489300  |
| O | 7.25148700  | -1.04963500 | -0.72176700 |

|   |             |             |             |
|---|-------------|-------------|-------------|
| H | 7.75910700  | -0.54074800 | -0.07317900 |
| O | 6.55662800  | 0.61297800  | 1.18385300  |
| H | -8.34977800 | -0.41544600 | 0.73998000  |
| C | 6.23897000  | 1.53141000  | 2.22543900  |
| H | 5.72430200  | 2.40469200  | 1.81871800  |
| H | 5.61845100  | 1.04829800  | 2.98351700  |
| H | 7.18818800  | 1.83102200  | 2.66036800  |
| H | 5.35215200  | -2.08459400 | -2.14201900 |

### 3d<sup>+</sup>

$H(\text{UM06-2X}) = -1254.546071 \text{ Ha}$

Charge = 1; Multiplicity = 2

|   |             |             |             |
|---|-------------|-------------|-------------|
| C | -2.81764400 | 1.75163500  | -0.28269600 |
| C | -4.77190100 | 0.42741200  | 0.19719300  |
| C | -4.07748200 | -0.77368900 | 0.13896100  |
| C | -2.63832700 | -0.76646700 | -0.17114500 |
| C | -2.02958500 | 0.53042500  | -0.41485200 |
| H | -6.64483700 | 1.41722900  | 0.50954400  |
| C | -6.13650800 | 0.46208900  | 0.47179000  |
| C | -4.76765500 | -1.97041800 | 0.36624700  |
| C | -6.12241500 | -1.95321800 | 0.64181500  |
| C | -6.80378100 | -0.73150200 | 0.69267500  |
| H | -4.21302100 | -2.89942700 | 0.31815300  |
| H | -6.65489100 | -2.87913400 | 0.81766000  |
| O | -4.15606300 | 1.62724000  | -0.00356000 |
| O | -2.41809200 | 2.88569900  | -0.38809700 |
| O | -2.01783500 | -1.83710600 | -0.22130300 |
| C | -0.66417200 | 0.63673700  | -0.75934700 |
| C | 0.02625200  | 1.92578600  | -1.06346700 |
| H | 0.09045800  | 2.52422600  | -0.15319700 |
| H | 1.02070300  | 1.75403700  | -1.46437000 |
| H | -0.56639300 | 2.49800700  | -1.77375800 |
| N | 0.04907900  | -0.49028800 | -0.83233200 |
| H | -0.42780700 | -1.37227400 | -0.59405000 |
| N | 1.40577100  | -0.51513200 | -1.05035900 |
| C | 2.25217100  | -0.19812800 | -0.05420900 |
| H | 1.71115500  | -0.90006100 | -1.93346900 |
| C | 3.71541800  | -0.34718700 | -0.28127200 |
| C | 4.54463100  | 0.03937500  | 0.80684600  |
| C | 4.32044400  | -0.82055900 | -1.41988400 |
| C | 5.98699100  | -0.06695500 | 0.69126900  |
| C | 5.74215800  | -0.92196300 | -1.52216400 |
| H | 3.74042700  | -1.13138500 | -2.27976900 |
| C | 6.56442900  | -0.55390200 | -0.49390400 |
| O | 1.83797600  | 0.23772600  | 1.02491100  |
| O | 6.73607200  | 0.28937400  | 1.69453900  |
| H | 6.20676800  | 0.60341900  | 2.44922400  |
| H | -7.86542800 | -0.71405700 | 0.90793600  |
| O | 4.09422400  | 0.49094700  | 1.92816300  |
| H | 6.16451300  | -1.30162400 | -2.44301600 |

|   |            |             |             |
|---|------------|-------------|-------------|
| H | 7.64204500 | -0.62552900 | -0.55866700 |
| H | 3.06395200 | 0.49666100  | 1.83624600  |

**3e<sup>+</sup>**

*H*(UM06-2X)= -1254.536132 Ha

Charge = 1; Multiplicity =2

|   |             |             |             |
|---|-------------|-------------|-------------|
| C | -3.01662300 | 1.72564200  | -0.34715500 |
| C | -4.94827100 | 0.33981800  | 0.04466400  |
| C | -4.20296200 | -0.83102700 | 0.09177500  |
| C | -2.74431800 | -0.77335300 | -0.10453600 |
| C | -2.17061900 | 0.53768300  | -0.35292800 |
| H | -6.87824200 | 1.25839400  | 0.17562700  |
| C | -6.32992900 | 0.32579700  | 0.21811400  |
| C | -4.85899700 | -2.04638900 | 0.31948200  |
| C | -6.23021100 | -2.07764800 | 0.49478700  |
| C | -6.96265900 | -0.88580000 | 0.44254100  |
| H | -4.26476200 | -2.95126200 | 0.35222000  |
| H | -6.73644600 | -3.01815100 | 0.67090500  |
| O | -4.36760200 | 1.55513900  | -0.16614200 |
| O | -2.65984800 | 2.87157100  | -0.47881400 |
| O | -2.08037200 | -1.81774500 | -0.05855200 |
| C | -0.78203100 | 0.69197000  | -0.57387300 |
| C | -0.12621700 | 1.99923600  | -0.87908100 |
| H | -0.67731800 | 2.50941500  | -1.66573900 |
| H | -0.16641800 | 2.63910900  | 0.00376700  |
| H | 0.90655700  | 1.85828900  | -1.18330300 |
| N | -0.01289500 | -0.39812200 | -0.52392600 |
| H | -0.46934000 | -1.29030800 | -0.29472200 |
| N | 1.35916400  | -0.36377200 | -0.58249000 |
| C | 2.07042600  | 0.12990200  | 0.46871600  |
| H | 1.78999900  | -0.63542700 | -1.45664000 |
| C | 3.56460600  | 0.04305600  | 0.32844800  |
| C | 4.18180900  | -1.02319700 | -0.27324300 |
| C | 4.31626100  | 1.11370400  | 0.92064700  |
| C | 5.58416900  | -1.02982800 | -0.32690200 |
| H | 3.63165100  | -1.86146700 | -0.68448400 |
| C | 5.67781900  | 1.13578000  | 0.87206400  |
| H | 3.76786000  | 1.91051100  | 1.40702400  |
| C | 6.34575900  | 0.06738200  | 0.24570800  |
| O | 1.56346300  | 0.62675200  | 1.44900900  |
| O | 7.64353400  | 0.05636900  | 0.18263300  |
| H | 7.98459500  | -0.73543600 | -0.26964800 |
| O | 6.32876700  | -1.96006300 | -0.86224900 |
| H | 5.82995100  | -2.69559200 | -1.25104700 |
| H | -8.03718800 | -0.90566000 | 0.57923100  |
| H | 6.26361500  | 1.93827300  | 1.29927800  |
